1 **Rumen disappearance of tannins from tropical tannin-rich plants: interplay**  
2 **between degradability, methane production and adherent rumen microbiota**

3

4

5 M. Rira<sup>1,2†</sup>, D.P. Morgavi<sup>1†</sup>, M. Popova<sup>1</sup>, G. Maxin<sup>1</sup>, and M. Doreau<sup>1</sup>

6

7 <sup>1</sup>INRAE, VetAgro Sup, UMR1213 Herbivores, F-63122 Saint-Genès-Champanelle,

8 France

9 <sup>2</sup>Ecole Nationale Supérieure de Biotechnologie, Ali Mendjli, BP E66, 25100

10 Constantine, Algeria

11

12 † E-mail: [moufida\\_r@yahoo.fr](mailto:moufida_r@yahoo.fr);

13 † [diego.morgavi@inrae.fr](mailto:diego.morgavi@inrae.fr)

14

15

## 16 **Abstract**

17 Condensed tannins in plants are found free and attached to protein and fibre but it is  
18 not known whether these fractions influence degradation and rumen function. The  
19 aim of the study was to explore the rumen degradation of tropical tannins-rich plants  
20 and elucidate their relationship with the disappearance of condensed tannins  
21 fractions. The effects on fermentation parameters and microbial communities  
22 colonising plant particles in the rumen was also assessed. We used in situ and in  
23 vitro approaches to study four leguminous: leaves from *Calliandra calothyrsus*,  
24 *Gliricidia sepium*, and *Leucaena leucocephala*, *Acacia nilotica* pods and the leaves of  
25 two agricultural by-products: *Manihot esculenta* and *Musa* spp. Plants were analysed  
26 to quantify levels of hydrolysable tannins, free condensed tannins, protein-bound  
27 condensed tannins and fibre-bound condensed tannins. Rumen dry matter, nitrogen  
28 and fibre (NDF) degradability, rumen disappearance of tannin fractions and microbial  
29 colonisation of plants was assessed in situ. The methane-mitigation potential of  
30 tannin-rich plants compared to a tropical forage without tannins was assessed in  
31 vitro. All plants contained more than 100 g/kg of condensed tannins with a large  
32 proportion (32 to 61%) bound to proteins. *Calliandra calothyrsus* had the highest  
33 concentration of condensed tannins at 361 g/kg, whereas *Acacia nilotica* was  
34 particularly rich in hydrolysable tannins (350 g/kg). Hydrolysable and free condensed  
35 tannins from all plants completely disappeared after 24 h incubation in the rumen.  
36 Disappearance of protein-bound condensed tannins was more variable with *Gliricidia*  
37 *sepium* showing the highest proportion (93%), *Manihot esculenta* and *Musa* spp.  
38 showed intermediate values of disappearance, and no disappearance was observed  
39 from *Calliandra calothyrsus* leaves. In contrast, fibre-bound condensed tannins  
40 disappearance averaged ~82% and did not vary between plants. Disappearance of

41 bound fractions of condensed tannins was not associated with degradability of plant  
42 fractions. Dry matter and nitrogen degradation were similar for all plants except  
43 *Calliandra calothyrsus* and *Musa* spp. that showed lower values. *Calliandra* and  
44 *Acacia nilotica* had also a lower NDF degradation. Methane production was also  
45 lower for these plants and for *Leucaena leucocephala* although for the latter total  
46 volatile fatty acids production was not affected and was similar to control. The  
47 presence of tannins interfered with the microbial colonisation of plants. Each plant  
48 had distinct bacterial and archaeal communities after 3 and 12 h of incubation in the  
49 rumen and distinct protozoal communities at 3 h. Adherent communities in tannin-  
50 rich plants had a lower relative abundance of fibrolytic microbes, notably *Fibrobacter*  
51 spp. Whereas, archaea diversity was reduced in high tannin-containing *Calliandra*  
52 *calothyrsus* and *Acacia nilotica* at 12 h of incubation. Here we show that the total  
53 amount of hydrolysable and condensed tannins contained in a plant govern the  
54 interaction with rumen microbes affecting degradability and fermentation. The effect  
55 of protein- and fibre-bound condensed tannins on degradability is less important.

56

57 **Keywords:** tropical plants; hydrolysable tannins; condensed tannins; methane, *in situ*  
58 degradability

59

60

## 61 **Introduction**

62 Feed availability is a major limitation in many tropical ruminant production systems.  
63 One way for farmers to increase forage availability in these grazing systems is to use  
64 leguminous trees for supplementing diets. Leaves from leguminous trees are a high-  
65 protein feed resource that balances the nutrition of ruminants grazing tropical grasses  
66 poor in protein (Roothaert and Paterson, 1997). However, they remain underutilised  
67 because of the presence of tannins that are often found at high concentrations. High  
68 concentrations of tannins can reduce voluntary feed intake and nutrient digestibility  
69 (Frutos et al., 2004). The decrease in nutritive value is associated with tannins'  
70 property to bind to proteins, both from the diet and digestive enzymes. Tannins also  
71 bind to structural carbohydrates present in plant cell walls (Mueller-Harvey et al.,  
72 2019). Despite these adverse effects, a low concentration of tannins in the diet can  
73 improve nitrogen (N) utilisation efficiency and have a positive enteric methane-  
74 reduction effect (Goel and Makkar, 2012). This latter effect is because tannins may  
75 reduce organic matter digestibility in the rumen even when total-tract digestibility is  
76 unchanged, or because they inhibit microbial populations, or both (Frutos et al.,  
77 2004).

78 Tannins are conventionally classified into two major groups: hydrolysable (HT) and  
79 condensed tannins (CT). Hydrolysable tannins consist of polyphenols (gallic acid  
80 and/or hexahydroxydiphenic acid) ester-linked to a hexose moiety. They are  
81 categorised according to their structural characteristics into two subgroups:  
82 gallotannins and ellagitannins. In contrast, CT are polymers of varying molecular  
83 weight composed of flavan-3-ol (e.g., catechin) or flavan-3,4-diol (proanthocyanidins)  
84 linked by C–C or C–O–C bonds. Condensed tannins are found in different fractions  
85 in plants: free, protein-bound, and fibre-bound (Mueller-Harvey and McAllan, 1992, Terrill et al., 1992,

86 Schofield et al., 2001). A better understanding of the effects of HT-rich and CT-rich forages  
87 on nutrient digestibility and methane mitigation properties would improve the  
88 management of such resources. To this end, the relationship between feed  
89 degradation and the disappearance of CT fractions must be established for  
90 developing feeding strategies overcoming undesirable effects when using tannin-rich  
91 forages. We hypothesised that rumen microbial degradation of tannin-rich forages is  
92 influenced not only by the abundance of tannins but also by their chemical form and  
93 binding to plants' structural components. This knowledge would be of considerable  
94 importance for the efficient utilisation of these forages in the tropics.  
95 Our objective was to study the degradation of tannin-rich forages in the rumen and  
96 establish the relationship with the amount and disappearance of their different tannin  
97 fractions. We connected these effects on forage degradation and tannin  
98 disappearance with the microbial communities colonising feed particles in the rumen  
99 and with fermentation parameters. We used six tropical forages from leguminous  
100 shrubs and agricultural by-products with differing amounts and nature of tannins. We  
101 carried out 1) an in situ experiment, in order to determine the ruminal degradation of  
102 forage components, including different tannin fractions, and the colonisation of feed  
103 particles by microbes, and 2) an in vitro experiment, in order to measure methane  
104 production and feed fermentation.

## 105 **Material and methods**

106 The use of experimental animals followed the guidelines for animal research of the  
107 French Ministry of Agriculture and other applicable guidelines and regulations for  
108 animal experimentation in the European Union. Animals were housed at the INRAE  
109 UE1414 Herbipôle Unit (Saint Genès Champanelle, France;

110 <https://doi.org/10.15454/1.5572318050509348E12>). Procedures were approved by  
111 French Ministry of Education and Research (APAFIS #8218-20161151782412).

## 112 ***Plant material***

113 Four browse species and two crops by-products rich in tannins and available in the  
114 tropics were selected. The browse species were leguminous shrubs: *Acacia nilotica*  
115 pods, *Calliandra calothyrsus*, *Gliricidia sepium* and *Leucaena leucocephala* leaves.  
116 The by-products were cassava (*Manihot esculenta*) leaves and banana (*Musa* spp.)  
117 leaves. These species are consumed by ruminants and have a large range of CT  
118 and HT content.

119 *Acacia nilotica* samples were collected from the Ferlo region of Senegal (15°N,  
120 15°W) having a mean annual rainfall of 200-400 mm and a mean temperature of 28-  
121 30°C. *Gliricidia sepium*, *Leucaena leucocephala*, *Manihot esculenta* and *Musa* spp.  
122 were collected in Guadeloupe, Basse-Terre Island, France (16°N, 61°W), having a  
123 mean annual rainfall of 1500-2000 mm and a mean temperature of 24-28°C.

124 *Calliandra calothyrsus* was collected from native shrubs in the south of the Réunion  
125 Island, France (21°S, 55°E) having a mean annual rainfall of 1000-1500 mm and a  
126 mean temperature of 20-24°C; leaves were harvested at a late vegetative stage.  
127 Following collection, fresh material was dried at 40 °C to avoid degradation or  
128 modification of tannins, ground to pass through a 1-mm grid and placed in air-tight  
129 plastic bags. Upon reception at the laboratory in Metropolitan France, samples were  
130 stored at room temperature until use for *in situ* and *in vitro* measurements. Forages  
131 poor in tannins were used as a control when necessary for a better understanding of  
132 processes. For studying microbial colonisation of feed particles, the control forage  
133 was the natural grassland hay used for feeding animals. For studying changes in

134 methane production and feed fermentation, the control forage was hay from a 75-d  
135 regrowth of natural grassland based on *Dichanthium* spp. harvested in Guadeloupe,  
136 Grande-Terre Island, France.

### 137 ***Experiment 1: In situ rumen degradation***

138 Three rumen-cannulated Holstein non-lactating cows were used for the study with an  
139 average body weight of  $737 \pm 40$  kg. Cows were housed in individual pens and fed  
140 natural grassland hay, first cycle harvested in Auvergne, France. A fixed amount of  
141 7.6 kg DM of hay was offered to each cow twice a day: 2/3 at 0900 h, 1/3 at 1600 h.  
142 Water was on free access. In situ ruminal incubations started after 15 days of  
143 adaptation to the diet.

144 Feeds were incubated in the rumen for 3, 6, 12, 24, 48 and 96 h. Three grams of  
145 ground samples were put into 5.5 × 12 cm polyester bags (pore size ca. 50 µm,  
146 model R1020, Ankom, Fairport, NY). Bags were hooked to a stainless-steel weight  
147 and inserted in the ventral sac of the rumen at 0800 h. Two successive series of  
148 incubations were performed for each cow. Each series had one bag per feed and  
149 incubation time for measurements of DM, N and NDF degradation, two bags per feed  
150 for measurements of CT disappearance at 24 h of incubation to get enough residues  
151 for further tannin analyses and two additional bags per feed for measurements of  
152 microbial colonisation at 3 h and at 12 h. At each designated incubation time, bags  
153 for measurements of DM, N and NDF degradation and tannin disappearance were  
154 removed from the rumen, immersed in cold water and then washed under running tap  
155 water until the water became clear. Zero-time disappearance was obtained by  
156 washing two non-incubated bags per feed as described above. Bags were kept at 4  
157 °C for 48 h then washed in a washing machine without detergent until clean water

158 was obtained (4 cycles of 10 min), dried at 40 °C for 96 h and weighed to determine  
159 rumen residual DM content. Bags for microbial analysis, taken out after 3 and 12 h of  
160 incubation, were gently squeezed, put on ice and immediately transferred to the lab  
161 where they were washed three times in phosphate-buffered saline at 4°C for 5 min  
162 on a rocking shaker at ~40 cycles per min. Bags were then snap-frozen in liquid N  
163 and stored at -80°C until gDNA extraction.

## 164 ***Experiment 2: In vitro fermentation***

165 Fermentations were performed using a batch technique (Rira et al., 2019). The  
166 donor animals were four Texel wethers fitted with a ruminal cannula and weighed on  
167 average  $80.7 \pm 6.9$  kg. Wethers were fed daily 900 g hay (natural grassland based  
168 on *Dichanthium* spp.) divided into equal amounts at 0700 and 1900 h. Wethers were  
169 adapted to the diet for 2 weeks before being used as donors. Four series of 24-h  
170 incubations were performed, one per wether. In each series, control *Dichanthium*  
171 and the six tannin-rich forages were anaerobically incubated in duplicate as  
172 described (Rira et al., 2019).

173 Gas production was measured at 24 h using a pressure transducer. After recording  
174 pressure, a gas sample (5 mL) was taken for methane analysis. For VFA  
175 determination, 0.8 mL of filtrate was mixed with 0.5 mL of 4 mg/mL crotonic acid and  
176 20 mg/mL metaphosphoric acid in 0.5 M HCl and frozen at -20°C until analysis.

## 177 ***Chemical analyses***

178 Feeds and feed residues in bags were analysed according to the Association of  
179 Official Analytical Chemists (AOAC, 2005). Organic matter in feeds was determined  
180 by ashing at 550 °C for 6 h (AOAC method number 923.03). Nitrogen (N) in feeds



181 and feed residues was determined by the Dumas method (crude protein (CP) = N ×  
182 6.25, AOAC method number 992.15). For residues at 24, 48 and 96 h, residues of  
183 the 3 cows were pooled to get enough residue for analysis. Cell wall components in  
184 feeds (NDF, ADF, and ADL) were determined using sodium sulphite, without heat-  
185 stable amylase and including residual ash (AOAC methods number 200.04 and  
186 973.18). Enzymatic dry matter digestibility was estimated in feeds by hydrolysis with  
187 pepsin in 0.1 N HCl then with fungal cellulose (Aufrere and Michalet-Doreau, 1988).  
188 Soluble CT, protein-bound CT and fibre-bound CT fractions in tannins-rich plants  
189 samples were extracted and analysed according to Terrill et al. (1992) as previously  
190 detailed (Rira et al., 2019). The concentration of CT in soluble, protein-bound and  
191 fibre-bound fractions was calculated with a standard calibration curve of purified  
192 quebracho tannins.

193 For HT, the rhodanine method was used for determination of gallotannins in feeds  
194 (Inoue and Hagerman, 1988). The potassium iodate (KIO<sub>3</sub>) method was used to  
195 estimate total HT (gallotannins and ellagitannins) in feeds (Hartzfeld et al., 2002).  
196 Details of these two methods are mentioned in (Rira et al., 2019). Ellagitannins were  
197 calculated using the difference between total HT and gallotannins.

198 After in vitro fermentation, gas composition was determined by gas chromatography  
199 (Micro GC 3000A; Agilent Technologies, Les Ulis, France) within 2 h after sampling.  
200 Gas molar concentration was calibrated using a certified standard. Volatile fatty  
201 acids were analysed by gas chromatography using crotonic acid as internal standard  
202 on a Perkin Elmer Clarus 580 GC (Perkin Elmer, Courtaboeuf, France) equipped with  
203 a Stabilwax-DA column (30 m by 0.53 mm i.d.) (Morgavi et al., 2013).

204 ***Microbial analysis: DNA extraction and sequencing strategy***

205 DNA was extracted following the protocol described by Yu and Morrison (2004). Total  
206 genomic DNA was sent to Roy J. Carver Biotechnology Center (Illinois, USA) for  
207 fluidigm amplification and Illumina sequencing using primers targeting bacterial 16S  
208 rRNA gene (V3-V5 region), archaeal 16S rRNA gene, fungal ITS2 and 18S rRNA  
209 gene for protozoa, as described (Saro et al., 2018, Popova et al., 2019).

210 ***Microbial bioinformatics analyses.***

211 Raw sequencing data were trimmed for quality (Phred score > 25), expected  
212 amplicon length (570 nt for bacteria 16S rRNA gene, 457 nt for archaea 16S rRNA  
213 gene, 660 nt for 18S rRNA gene and 356 nt for ITS) and maximum 5 primer  
214 mismatches. Sequences were analysed using computational pipelines as described  
215 (Saro et al., 2018). On average per sample, we obtained 28 045 ( $\pm 6 457$ ) reads of  
216 bacterial 16S rRNA gene, 23 718 ( $\pm 4 726$ ) for archaeal 16S rRNA gene and 18 645  
217 ( $\pm 2 696$ ) for eukaryotic 18S rRNA gene. For fungi, most samples had a low number  
218 of reads, precluding further comparative analysis between samples. As forward and  
219 reverse reads for bacterial 16S rRNA gene amplicons reads and eukaryotic 18S  
220 rRNA gene amplicons reads were not overlapping, sequence data were analysed  
221 using IM Tornado pipeline (Jeraldo et al., 2014) and taxonomy assigned according to  
222 Silva v128. Archaeal sequences were analysed following standard QIIME pipeline  
223 (Caporaso et al., 2010) and taxonomy assigned with RIM DB (Seedorf et al., 2014).  
224 Sequencing data are available in the Sequence Read Archive (SRA) under  
225 accession ID PRJNA554299.  
226 OTU tables were analysed in R using the package “vegan” (Oksanen et al., 2016).  
227 Diversity indices (Shannon, Simpson, Richness and Evenness) were computed using

228 implemented functions and statistical differences were tested using the non-  
229 parametric Kruskal-Wallis test to evaluate the effect of plant at each incubation time.  
230 For  $\beta$ -diversity analysis, OTU tables were rarefied to an even depth: 3460 reads for  
231 bacteria, 4103 for Archaea and 1000 for protozoa. Bray-Curtis method was used for  
232 computing dissimilarity indices with the vegdist function. Principal component  
233 analysis (PCoA) was performed on dissimilarity matrices with prcomp function.  
234 Permutational multivariate analysis of variance was performed using Adonis function.  
235 Correlations were computed using vegan's function "corr" and "Hmisc" and "corrplot"  
236 packages were used for plotting correlation matrices. Differential abundance  
237 analysis to evaluate the effect of plant at each incubation time were done with  
238 MicrobiomeAnalyst (Chong et al., 2020) using default data filtering (4 minimum count,  
239 20% prevalence, low variance filter: 10% inter-quantile range), relative log expression  
240 (RLE) for normalisation and the metagenomeSeq package (Paulson et al., 2013).

#### 241 ***Degradation and fermentation data: calculations and statistical analyses***

242 Rumen degradability (D) of DM and N were calculated using an exponential model  
243 with lag time (Denham et al., 1989):

$$244 \quad D(t) = a + b(1 - e^{-c(t-L)})$$

245 where D is the degradation after t hours of rumen incubation; t = hours of rumen  
246 incubation (0, 3, 6, 12, 24, 48 and 96 h); a = rapidly degradable fraction (%); b =  
247 slowly degradable fraction (%); c = degradation rate constant of the b fraction (h<sup>-1</sup>);  
248 L = lag time before the beginning of degradation of the b fraction (h).

249 The nonlinear procedure (PROC NLIN) of SAS v9.4 (SAS Inst. Inc., Cary, NC, USA)  
250 was used to fit degradation data to the model. This model was chosen after a  
251 preliminary comparison of models with or without lag time, because lag time was

252 higher than 3 h for 4 of the 6 feeds, and because the model with lag time globally led  
253 to lower sum of squares than the model without lag time. The theoretical  
254 degradability in the rumen derived from the model (TDm) was calculated from the  
255 equation:

$$256 \quad \text{TDm} = a + [b \times c / (c + kp)]$$

257 where  $kp$  is the passage rate of solid contents out of the rumen. A unique value of  
258  $0.04 \text{ h}^{-1}$  was used for all feeds. Rumen degradability of NDF did not fit to the  
259 exponential model due to a linear degradation rate for *Calliandra calothyrsus* and to  
260 erratic variations for other two forages. For NDF calculations of degradability, we  
261 used instead a stepwise method (Kristensen et al., 1982):

$$262 \quad \text{TDs} = \sum_{(i=0 \text{ to } n)} (\text{Dt}_{(i+1)} - \text{Dt}_i) \times p(t_i, t_{i+1})$$

263 where  $(\text{Dt}_{(i+1)} - \text{Dt}_i)$  is the amount of feed degraded between times  $t_{i+1}$  and  $t_i$ , and  $p$   
264  $(t_i, t_{i+1})$  is the proportion of feed remaining in the rumen between times  $t_i$  and  $t_{i+1}$   
265 with  $p_{ti} = e^{-kpt_i}$ .

266 From VFA production in the in vitro experiment, fermented organic matter (FOM) was  
267 calculated by the stoichiometric equation of Demeyer and Van Nevel (1975):

268  $\text{FOM} = 162 (0.5 \text{ acetate} + 0.5 \text{ propionate} + \text{butyrate} + \text{valerate})$  where FOM is  
269 expressed in mg and VFA in mmol.

270 Data of both experiments were submitted to the same mixed model using the MIXED  
271 procedure of SAS including feed ( $n = 6$  for in situ experiment and  $n = 7$  for in vitro  
272 experiment) as fixed effect and animal ( $n = 3$  for in situ experiment and  $n = 4$  for in  
273 vitro experiment) as random effect. Differences between feeds were analysed using  
274 the Tukey t-test. Effects were declared significant when  $P < 0.05$ . Principal  
275 component analyses were performed using Minitab® version 17 software (Minitab  
276 Inc., State College, PA). Average values for each of the 6 tannin-rich plants were

277 included for 19 variables: 7 from chemical composition, 5 from experiment 1 and 7  
278 from experiment 2.

## 279 **Results**

### 280 ***Forage characteristics***

281 The chemical composition of forages is shown in Table 1. Tannin-containing plants  
282 have higher concentration of CP and lower concentration of fibre than the control  
283 forage, except *Musa* spp. The enzymatic DM digestibility test showed high values  
284 (~70%) for *Acacia nilotica* pods, *Leucaena leucocephala*, *Gliricidia sepium* and  
285 *Manihot esculenta* leaves, whereas digestibility of *Musa* spp. and *Calliandra*  
286 *calothyrsus* leaves was much lower at 40% or less. There were marked differences  
287 among forages in both the total amount of CT and the fraction that tannins were  
288 associated with (Table 1). For all forages, bound CT were predominantly ( $\geq 60\%$ )  
289 linked to protein compared to fibre. The proportion of free CT was particularly large  
290 in *Calliandra calothyrsus* leaves (54% of total CT) and *Acacia nilotica* pods (58% of  
291 total CT). In addition, *Acacia nilotica* pods were particularly rich in HT (350 g/kg DM  
292 versus less than 33 g/kg DM for the other plants). For the others forages consisting  
293 in plant leaves, the HT content was minor. For all forages, ellagitannins were  
294 predominant representing  $\geq 80\%$  of total HT.

### 295 ***In situ dry matter, N and NDF degradability***

296 Dry matter degradability was similar for *Acacia nilotica* pods, *Gliricidia sepium*,  
297 *Manihot esculenta*, and *Leucaena leucocephala* with values around 65%, whereas  
298 only a third of *Musa* spp. and *Calliandra calothyrsus* leaves were degraded (Table 2).  
299 However, for forages presenting similar degradability, there were differences in the

300 proportion of degraded fractions and rate of degradation. *Acacia nilotica* pods and  
301 *Gliricidia sepium* had a higher proportion of soluble fraction (a), whereas *Leucaena*  
302 *leucocephala* and *Manihot esculenta* leaves had a higher proportion of potentially  
303 degradable fraction (b). *Musa* spp. and *Calliandra calothyrsus*, had lower values for  
304 the (a) and (b) fractions than the others forages. Although they have similar  
305 degradability, *Musa* spp. leaves had a low proportion of slowly degraded fraction (b)  
306 at 14%, whereas *Calliandra calothyrsus* leaves were the most slowly degraded  
307 ( $0.022\% \text{ h}^{-1}$ ).

308 The N degradability showed similar values and ranking than DM degradability.  
309 Notwithstanding, there was a higher variation among forages with *Manihot esculenta*  
310 leaves presenting the highest overall degradability due to its high proportion of  
311 soluble fraction (a) and high rate of degradation (c). For both DM and N, the  
312 theoretical degradability calculated according to the model was similar to values  
313 obtained by a stepwise calculation. The rumen degradability of NDF was calculated  
314 with the stepwise method only because the exponential method with lag time failed to  
315 produce suitable models for most forages. Compared to N, NDF was generally less  
316 degraded. In most plants around one third of NDF was degraded in the rumen;  
317 notable exceptions were *Acacia nilotica* pods with 14% disappearance and  
318 *Calliandra calothyrsus* with only 6%.

### 319 **Condensed tannins, N and NDF disappearance**

320 Results of 24-h disappearance of tannins, are presented in Table 3, together with N  
321 and NDF disappearance to assess if there is a relationship between these  
322 parameters. The disappearance of N and NDF at 24 h was calculated from  
323 degradability values above to have the same point in time as tannins. After 24 h in

324 the rumen, free CT disappeared completely or almost completely (~98%) in all  
325 forages. Among those plants exhibiting a high proportion of protein-bound CT, the  
326 disappearance of this fraction was variable with up to 93% loss in *Gliricidia sepium*  
327 and no disappearance in *Calliandra calothyrsus*. For this latter forage, it is noted that  
328 N disappeared at 24 h was ~32% but it had also the highest amount of CT linked to  
329 protein (Table 1). For fibre-bound CT, the average disappearance at 24 h was ~80%  
330 and, despite numerical differences, did not differ significantly between forages ( $P >$   
331 0.05). The disappearance of total CT reflected the differences observed in the  
332 disappearance of the various fractions and ranged from 58% for *Calliandra*  
333 *calothyrsus* leaves to 95% for *Gliricidia sepium*.

#### 334 ***Microbial community attached to tannin-rich plants***

335 We studied ruminal microbial communities attached to plants after 3 and 12 h of  
336 incubation in the rumen. Incubation times were chosen in order to catch the biphasic  
337 primary and secondary colonisation process described in temperate plants (Elliott et  
338 al., 2018). Based on the known differences in communities between these two  
339 phases (Mayorga et al., 2016, Elliott et al., 2018), most results are presented by  
340 incubation time to better identify the effect of plants.

341 For anaerobic fungi, most samples had a low number of reads and no downstream  
342 analysis was made. However, it is noted that the only plant that was consistently  
343 colonised by anaerobic fungi was *Musa* with a threefold increase from 3 to 12 h  
344 reaching more than 4000 reads on average (Supplementary Figure 1). For protozoa,  
345 *Leucaena leucocephala* had low numbers of reads but it was considered a  
346 characteristic of the plant and these samples were included in downstream analysis.



347 Changes on alpha diversity indices were more marked for bacteria at 3 h  
348 (Supplementary Table 1). *Calliandra calothyrsus* had high alpha diversity values that  
349 remained numerically higher than for other plants at 12 h. Whereas, archaeal indices  
350 differed more at 12 h than at 3 h; *Acacia nilotica* and, to a lesser degree, *Calliandra*  
351 *calothyrsus* were the plants with the lowest values.

352 Principal coordinated analysis plots showed differences in community structure that  
353 were influenced by the type of plant (Figure 1). Permanova analyses highlighted  
354 significant differences between plants for all microbial communities at 3 h (Adonis  $P <$   
355  $0.001$ ;  $R^2 = 0.53, 0.43$  and  $0.59$  for bacteria, archaea and protozoa, respectively).  
356 These differences remained at 12 h for bacteria (Adonis  $R^2 = 0.69, P < 0.001$ ) and  
357 archaea (Adonis  $R^2 = 0.48, P < 0.001$ ). At 3 h, the first component separated  
358 bacterial communities attached to *Acacia nilotica*, *Calliandra calothyrsus* and  
359 *Leucaena leucocephala* from *Musa*, *Manihot esculenta*, and the control hay.  
360 However, at 12 h, only *Musa* and control hay grouped together clearly separated  
361 from the other plants. For archaea, *Acacia nilotica* and *Calliandra calothyrsus* were  
362 separated from other plants both at 3 and 12 h of incubation. Whereas, for protozoa,  
363 *Leucaena leucocephala* was clearly separated from all other plants at 3 h,  
364 undoubtedly due to the low number of reads recovered from this plant; and, at 12 h  
365 not clear grouping of plants was observed in agreement with permanova results. The  
366 bacterial and archaeal communities correlated with some chemical features of plants;  
367 NDF and ADF contents influenced the bacterial community structure and total  
368 concentration of tannins, both CT and HT, had a stronger influence on the archaeal  
369 community structure (Supplementary Figure 2).

370 Differential abundance analyses showed a numerically higher proportion of  
371 Proteobacteria for plants richer in tannins at 3 h of incubation (Table 4). At lower



372 taxonomical levels, the family Rhodospirillaceae from the Proteobacteria was  
373 particularly abundant in *Calliandra calothyrsus* (Supplementary Table 4), whereas the  
374  $\gamma$ -proteobacterium *Pantoea* sp. was more abundant in *Calliandra calothyrsus* and  
375 *Leucaena leucocephala* (Supplementary Table 2). In contrast, the phylum  
376 Fibrobacteres was more abundant in *Musa* and control hay, which were the plants  
377 containing a higher amount of fibre and less tannins. The differences were  
378 particularly striking at 12 h of incubation with ~25% of sequences belonging to  
379 Fibrobacteres in these two plants compared to values as low as 3% for *Acacia*  
380 *nilotica* (Table 4). Results for families and genera levels are shown in Supplementary  
381 Tables 2 to 5. *Lachnospiraceae* were proportionally more abundant in *Calliandra*  
382 *calothyrsus*, *Leucaena leucocephala* and *Glyricidia sepium* at 3 h of incubation and  
383 generally more abundant in tannin-rich plants at 12 h of incubation. Representative  
384 genera of this family, such as *Butyrivibrio* and *Oribacterium* showed the same trend.  
385 There were no marked differences in relative abundance of archaea (Supplementary  
386 Tables 6 and 7) and, for protozoa, the main change was observed in the relative  
387 abundance of *Isotricha* spp. that was higher at 3 h in *Acacia nilotica*; differences were  
388 less marked at 12 h. In accord with these results, there was a positive correlation  
389 between *Isotricha* spp. and the levels of HT and TCT (Supplementary Tables 8 and  
390 9, and Supplementary Figure 2).

391 Correlation analyses considering the chemical composition of plants, including the  
392 various fractions of tannins, and the most abundant ( $\geq 1\%$ ) OTUs only show a few  
393 highlighted negative and positive associations. At 3 h, a *Succiniclasticum\_uncl.* OTU  
394 was negatively correlated to TCT and HT and a *Chistensenellaceae* R7 OTU was  
395 positively associated to the fibre-linked fraction of CT. However, at 12 h, the same  
396 *Chistensenellaceae* R7 OTU and a *Prevotella* OTU were negatively correlated to the

397 protein linked fraction of CT. A *Fibrobacter* OTU was negatively correlated to HT,  
398 whereas *Ruminococcaceae\_NK4A214\_group*, *Rikenellaceae\_RC9\_gut\_group\_uncl.*  
399 and a *Butyrivibrio\_2\_uncl.* were positively correlated to CT (total, free and protein  
400 linked) (Supplementary Figure 3).

#### 401 ***In vitro* rumen fermentation of forages**

402 All tannin-rich plants had lower production of gas than control (Table 5). *Musa* spp.  
403 and *Calliandra calothyrsus* were those that produced less gas. Only *Musa* spp.,  
404 *Calliandra calothyrsus* and *Acacia nilotica* had lower VFA production and FOM than  
405 control ( $P < 0.05$ ). All tannin-rich plants produced more acetate and less butyrate  
406 than control, resulting in the absence of difference in the ratio of acetate or  
407 acetate+butyrate to propionate between control and tannin-rich plants. Compared to  
408 control, methane production when expressed as mL/24 h was reduced for *Leucaena*  
409 *leucocephala*, and to a greater extent for *Musa* spp., *Calliandra calothyrsus* and  
410 *Acacia nilotica*. When methane production was expressed per 100 mM of VFA  
411 produced, only *Acacia nilotica* and *Musa* spp. decreased production ( $P < 0.05$ )  
412 compared to control.

413 The relationships between the content and type of tannins in plants and the *in vitro*  
414 and *in situ* parameters were further explored through a principal component analysis  
415 (Supplementary Figure 4) that showed that indicators of the extent of ruminal  
416 degradation and fermentation, including methane, were opposed on the first axis to  
417 total CT content and CT fractions, but not to HT.

## 418 Discussion

419 All plant species used in this experiment were rich in CT. The amount of CT was  
420 within those reported in the literature although mostly on the higher end. The higher  
421 CT values in this work can be explained by the analytical method, involving a double-  
422 extraction procedure and different solvents for different fractions, potentially yielding  
423 a higher amount of extracted tannins than faster methods. Four plants had a higher  
424 amount of protein-bound tannins than free tannins whereas two plants (*Acacia* and  
425 *Calliandra*) had a higher amount of free tannins. It is generally reported, even for  
426 plants used in this study such as *Leucaena leucocephala* and *Calliandra calothyrsus*  
427 that free CT are higher than protein-bound CT that in turn is higher than fibre-bound  
428 CT (Terrill et al., 1992, Jackson et al., 1996, Dentinho and Bessa, 2016). However,  
429 similar to total CT, there are important divergences in the literature (Perez-  
430 Maldonado and Norton, 1996, Rubanza et al., 2005).

431 In animal nutrition studies, the HT content of plant species is seldom measured and  
432 when done it is generally by using non-specific methods, e.g. they are often  
433 calculated by the difference between total tannins and CT. We used methods that  
434 specifically measured the content of total HT and gallotannins. Among the plants  
435 used in our study only *Acacia nilotica* was rich in HT. Goel et al. (2015) also reported  
436 high values of HT for this plant (186 g/kg DM, estimated by the difference between  
437 total tannins and CT). The other plants used in our study are recognised sources of  
438 CT but their HT content is seldom reported. Our results show that these plants rich in  
439 CT are also a source of HT, which albeit minor can also have a biological effect.

440 ***Degradation of tannin-rich plants in the rumen - relationship with tannin***

441 ***content***

442 *Calliandra calothyrsus* and *Musa* spp. had a lower DM and N degradability (~33%)  
443 than the other plants (~65%). However, there is no a single reason that may explain  
444 these differences. *Calliandra calothyrsus* had a markedly low NDF degradability at  
445 6% but it was the disappearance of condensed tannins, representing one third of  
446 plant weight, that affected the calculation of DM degradation. Whereas, the low DM  
447 degradability of *Musa* spp. is mainly explained by the high proportion of NDF (65% on  
448 a DM base). In both cases the rate constant *c* was low. In contrast, the high  
449 degradability of *Leucaena leucocephala*, *Glyricidia sepium*, *Acacia nilotica*, and  
450 *Manihot esculenta* was due to the high N degradability, to the extensive  
451 disappearance of CT, and to the total disappearance of HT from bags. Disproving  
452 our hypothesis, we did not observe any relationship either between N degradability  
453 and total or protein-bound tannin content, or between NDF degradability and total or  
454 fibre-bound tannin content. Similarly, the absence of relationship between total  
455 extractible tannins of plants and DM disappearance in situ of seven temperate  
456 browses was reported by Khazaal et al. (1993). This contrasts with in vitro  
457 degradation results obtained with 72 African browses where protein and NDF  
458 degradability were negatively correlated with soluble CT but not with insoluble CT  
459 (Rittner and Reed, 1992). The difference with our results may be explained either by  
460 the low number of forages in our experiment or by the methodology (in vitro vs in  
461 situ).

462 ***Rumen disappearance of tannins from plants***

463 Information on tannin disappearance in the digestive tract of ruminants is scarce.

464 Hydrolysable tannins can be degraded by rumen microbes (Brooker et al., 1994,

465 Goel et al., 2005). However, as HT would be washed out of the bags, we did not

466 attempt to quantify them after incubation.

467 Most authors agree that there is no evidence for free CT degradation by microbes in

468 the rumen (McSweeney et al., 2001b, Patra et al., 2012). Notwithstanding, the

469 complete rumen disappearance of free CT observed is logical because these

470 compounds are water-soluble and are washed out of the bags. A nearly complete

471 (99%) disappearance of free CT of *Calliandra calothyrsus* between mouth and faeces

472 was reported by Perez-Maldonado and Norton (1996).

473 The disappearance of protein-bound CT varied largely between plants from 21 to

474 98%. This variation may be due to differences in strength of binding between

475 proteins and tannins (Le Bourvellec and Renard, 2019). As stated above, no

476 relationship was observed between disappearance of proteins and protein-bound CT

477 except for *Calliandra calothyrsus* that had a low N degradation and no disappearance

478 of protein-bound tannins. For this plant, a negative value for disappearance was

479 even obtained. This may be due to a technical problem as interactions with the

480 insoluble matrix, proteins, polysaccharides, and other plant polymers can decrease

481 the solubility of tannins in the extractant, resulting in an underestimation of tannin

482 content in feeds (Dentinho and Bessa, 2016). Another possible reason is a linkage

483 of dietary free CT with proteins. According to Hagerman (1989), if CT are present in

484 excess, all proteins available are bound to tannins, leading to insoluble complexes.

485 This is the case for *Calliandra calothyrsus* which contains more tannins than proteins

486 (361 vs 217 g/kg, respectively).

487 The fibre-bound CT represented a small proportion of the total CT content of the  
488 forages used in our study. Their disappearance in the rumen varied between 61 and  
489 98% but differences between forages were not significant.

#### 490 ***Tannin-rich plants and methane production***

491 Tannin concentration is often considered a critical factor affecting ruminal  
492 fermentation (Patra and Saxena, 2011). Correspondingly, we generally observed  
493 that the CT content of plants was negatively associated to in situ rumen degradability  
494 and to in vitro fermentation parameters including methane production. However, the  
495 effect on methane of some plants could also be due to parameters other than CT. As  
496 protein concentration affects the volume of gas produced by the bicarbonate buffer in  
497 the in vitro fermentation system, we will discuss methane production normalised by  
498 VFA for assessing the impact of tannin-rich plants independently of the extent of gas  
499 production. Compared to control, *Acacia nilotica* and *Musa* spp. reduced methane  
500 production but probably not for the same reasons. For *Musa* spp. the effect cannot  
501 be ascribed to the amount of tannins as this plant has a low concentration compared  
502 to others. The effect could be due to other secondary compounds such as  
503 polyphenols that are present in *Musa* spp. leaves in large amounts (Marie-  
504 Magdeleine et al., 2010). For *Acacia nilotica*, tannins are the most plausible cause of  
505 methane inhibition as this plant contains CT but is especially rich in HT. We  
506 previously showed that HT could be more efficient than CT for reducing methane  
507 (Rira et al., 2019). Several authors have also reported that HT can reduce methane  
508 production without compromising overall rumen fermentation, but to date only  
509 extracts were studied (Bhatta et al., 2009, Hassanat and Benchaar, 2013,  
510 Jayanegara et al., 2015). It is likely that HT do not interfere with rumen fermentation

511 because they do not bind to protein or fibre and do not have an inhibitory effect on  
512 microbes that can also degrade HT in the rumen (Patra et al., 2012).  
513 In this study, *Gliricidia sepium* and *Manihot esculenta* did not decrease methane  
514 production. In previous studies, *Gliricidia sepium* was less effective than *Leucaena*  
515 *leucocephala* and *Manihot esculenta* for decreasing methane *in vitro* (Rira et al.,  
516 2015) and *in vivo* (Archimede et al., 2016). The absence of effect of *Manihot*  
517 *esculenta* on methane production in this study is unexpected, but is consistent with  
518 the large variability of response of methane production to CT for a same plant  
519 (Piluzza et al., 2014).

#### 520 ***Tannin-rich plants modulate adherent rumen microbes***

521 The colonising microbial community differed between plants and was influenced by  
522 tannins as well as other chemical features such as fibre content. As plants were  
523 incubated in the same rumen environment and exposed to the same microbiota there  
524 is no doubt that the plant itself is selecting for their adherent microbiota, at least in the  
525 initial colonisation stages monitored in this work. The process is probably a  
526 combination of microbial tolerance to tannins' toxicity (Frutos et al., 2004) and  
527 substrate preferences. Our results brings new insight on how methane production in  
528 the rumen is affected by tannin-rich plants and concurs with the reported absence of  
529 a relationship between chemical structure and biological effect of tannins including  
530 methane production (McAllister et al., 2005, Naumann et al., 2018).

531 There is no equivalent published information on the attachment of rumen microbes to  
532 these plants for a straight comparison. In contrast, the effect of tannin-rich plants or  
533 extracts added to the diet have been reported in several studies.

534 The fungal community was targeted in our study but it was not further analysed as a  
535 low number of reads was recovered. Nevertheless, *Musa* spp. with one of the lowest  
536 amounts of tannins among the tested plants was the only one colonised by fungi.  
537 This result could be interpreted as an inhibitory effect of tannins on fungi as reported  
538 previously (Muhammed et al., 1995). For protozoa, it is noted that *Isotricha* spp.  
539 were more abundant on *Acacia nilotica* samples at 3 h of incubation suggesting that  
540 this genus was attracted to HT particularly abundant in this plant. This result is only  
541 comparable within this study as the pore size of the in sacco incubation bags may  
542 obstruct the free passage of protozoa but it can help explain the variable effect of  
543 different tannin sources on protozoa reported in the literature (Patra and Saxena,  
544 2011).

545 The plants' characteristics clearly influenced the structure of the attached bacterial  
546 community. Initially, each plant seems to harbour a distinct community of primary  
547 colonisers. Then, at 12 h when most of soluble tannins are no longer interfering, the  
548 communities in tannin-rich plants became more similar but distinctly separated from  
549 communities found in the control forage without tannin and the low-tannin containing  
550 *Musa*. For archaea the pattern is different with only *Acacia nilotica* and *Calliandra*  
551 *calothyrsus* clearly separating from other plants. This indicate that the plant effect is  
552 more important on colonising bacteria than on archaea, which is logical as the latter  
553 rely on metabolic end products from other microbes. The different archaeal structure  
554 for tannin-rich *Acacia nilotica* and *Calliandra calothyrsus* could reflect a toxicity  
555 threshold attained at the biofilm microenvironment level that needs to be proved.  
556 Our results bring new evidence indicating that some of the differences reported on  
557 rumen microbes when tannins are supplemented to the diet are due to changes in  
558 the colonisation and development of feed-attached communities. The low proportion



559 of *Fibrobacter* attached to tannin-rich plants may explain why this fibrolytic bacterium  
560 is often affected in supplemented animals (McSweeney et al., 2001a, Diaz Carrasco  
561 et al., 2017, Harun et al., 2017, Salami et al., 2018). On the other hand, some  
562 bacteria that were positively associated plants rich in tannins could provide new  
563 avenues of exploration for improving the nutritional value of these forages through  
564 modulation of the microbiota.

## 565 **Conclusion**

566 We used an integrated approach for assessing the effect of tannin-rich plants on  
567 rumen processes. Tannin-rich plants have contrasting proportions of tannins bound  
568 to protein or fibre. However, there was no relationship between the amount and  
569 disappearance of bound tannins and the rumen degradability of protein or fibre of the  
570 plants studied in this work, except for *Calliandra calothyrsus* that was extremely rich  
571 in CT. Tannins present in plants restrained the colonization of certain rumen  
572 microbial populations known to play a role in the degradation of recalcitrant feeds.  
573 These results expand our understanding of the effects of tannins in the rumen  
574 opening the way to improve their use in the diet of ruminants.

## 575 **Acknowledgements**

576 The authors thanks the staff of UE 1414 Herbipôle for their technical collaboration,  
577 animal care and management, A. Torrent and L. Genestoux for their contribution in  
578 the experimental setup and sample analysis, and A. Roche (intern student at INRAE)  
579 for her contribution in the analysis of condensed tannins. We are grateful to the  
580 INRAE MIGALE bioinformatics platform (<http://migale.jouy.inra.fr>) for providing  
581 computational resources and A. Bernard for initial bioinformatic analysis.

## 582 References

- 583 AOAC. 2005. Official methods of analysis of AOAC International. 16th ed. AOAC International, Washington, DC.
- 584 Archimede, H., M. Rira, D. J. Barde, F. Labirin, C. Marie-Magdeleine, B. Calif, F. Periacarpin, J. Fleury, Y.  
585 Rochette, D. P. Morgavi, and M. Doreau. 2016. Potential of tannin-rich plants, *Leucaena leucocephala*,  
586 *Glyricidia sepium* and *Manihot esculenta*, to reduce enteric methane emissions in sheep. J. Anim.  
587 Physiol. Anim. Nutr. (Berl) 100:1149-1158. <http://doi.org/10.1111/jpn.12423>
- 588 Aufrere, J. and B. Michalet-Doreau. 1988. Comparison of methods for predicting digestibility of feeds. Anim.  
589 Feed Sci. Technol. 20:203-218. [http://doi.org/https://doi.org/10.1016/0377-8401\(88\)90044-2](http://doi.org/https://doi.org/10.1016/0377-8401(88)90044-2)
- 590 Bhatta, R., Y. Uyeno, K. Tajima, A. Takenaka, Y. Yabumoto, I. Nonaka, O. Enishi, and M. Kurihara. 2009.  
591 Difference in the nature of tannins on in vitro ruminal methane and volatile fatty acid production and  
592 on methanogenic archaea and protozoal populations. J. Dairy Sci. 92:5512-5522.  
593 <http://doi.org/10.3168/jds.2008-1441>
- 594 Brooker, J. D., L. A. Odonovan, I. Skene, K. Clarke, L. Blackall, and P. Muslera. 1994. *Streptococcus caprinus* sp  
595 nov, a tannin-resistant ruminal bacterium from feral goats. Letters in Applied Microbiology 18:313-  
596 318. <http://doi.org/10.1111/j.1472-765X.1994.tb00877.x>
- 597 Caporaso, J. G., J. Kuczynski, J. Stombaugh, K. Bittinger, F. D. Bushman, E. K. Costello, N. Fierer, A. G. Pena, J. K.  
598 Goodrich, J. I. Gordon, G. A. Huttley, S. T. Kelley, D. Knights, J. E. Koenig, R. E. Ley, C. A. Lozupone, D.  
599 McDonald, B. D. Muegge, M. Pirrung, J. Reeder, J. R. Sevinsky, P. J. Turnbaugh, W. A. Walters, J.  
600 Widmann, T. Yatsunenko, J. Zaneveld, and R. Knight. 2010. QIIME allows analysis of high-throughput  
601 community sequencing data. Nat Methods 7:335-336. <http://doi.org/10.1038/nmeth.f.303>
- 602 Chong, J., P. Liu, G. Zhou, and J. Xia. 2020. Using MicrobiomeAnalyst for comprehensive statistical, functional,  
603 and meta-analysis of microbiome data. Nat. Protocols 15:799-821. [http://doi.org/10.1038/s41596-  
604 019-0264-1](http://doi.org/10.1038/s41596-019-0264-1)
- 605 Demeyer, D. and C. Van Nevel. 1975. Methanogenesis, an integrated part of carbohydrate fermentation and its  
606 control. Pages 366–382 in Digestion and metabolism in the ruminant. I. McDonald and A. Warner, ed.  
607 The University of New England Publishing Unit, Armidale, Australia.
- 608 Denham, S. C., G. A. Morantes, D. B. Bates, and J. E. Moore. 1989. Comparison of two models used to estimate  
609 in situ nitrogen disappearance. J. Dairy Sci. 72:708-714. [http://doi.org/10.3168/jds.S0022-  
610 0302\(89\)79163-3](http://doi.org/10.3168/jds.S0022-0302(89)79163-3)
- 611 Dentinho, M. T. P. and R. J. B. Bessa. 2016. Effect of tannin source and pH on stability of tannin-protein and  
612 fibre complexes. Rev. Ciênc. Agrárias 39:114-121. <http://doi.org/10.19084/RCA15062>
- 613 Díaz Carrasco, J. M., C. Cabral, L. M. Redondo, N. D. Pin Viso, D. Colombatto, M. D. Farber, and M. E. Fernandez  
614 Miyakawa. 2017. Impact of chestnut and quebracho tannins on rumen microbiota of bovines. Biomed  
615 Res. Int. 2017:9610810. <http://doi.org/10.1155/2017/9610810>
- 616 Elliott, C. L., J. E. Edwards, T. J. Wilkinson, G. G. Allison, K. McCaffrey, M. B. Scott, P. Rees-Stevens, A. H.  
617 Kingston-Smith, and S. A. Huws. 2018. Using 'omic approaches to compare temporal bacterial  
618 colonization of *Lolium perenne*, *Lotus corniculatus*, and *Trifolium pratense* in the rumen. Front.  
619 Microbiol. 9:2184. <http://doi.org/10.3389/fmicb.2018.02184>
- 620 Frutos, P., G. Hervás, F. J. Giráldez, and A. R. Mantecón. 2004. Review. Tannins and ruminant nutrition. Span. J.  
621 Agric. Res. 2:191-202.
- 622 Goel, G. and H. P. Makkar. 2012. Methane mitigation from ruminants using tannins and saponins. Trop. Anim.  
623 Health Prod. 44:729-739. <http://doi.org/10.1007/s11250-011-9966-2>
- 624 Goel, G., A. K. Puniya, C. N. Aguilar, and K. Singh. 2005. Interaction of gut microflora with tannins in feeds.  
625 Naturwissenschaften 92:497-503. <http://doi.org/10.1007/s00114-005-0040-7>

- 626 Goel, G., M. Raghav, V. Beniwal, and A. K. Puniya. 2015. Anaerobic degradation of tannins in *Acacia nilotica*  
627 pods by *Enterococcus faecalis* in co-culture with ruminal microbiota. J. Gen. Appl. Microbiol. 61:31-33.  
628 <http://doi.org/10.2323/jgam.61.31>
- 629 Hagerman, A. E. 1989. Chemistry of Tannin-Protein Complexation. Pages 323-333 in Chemistry and Significance  
630 of Condensed Tannins. R. W. Hemingway, J. J. Karchesy, and S. J. Branham, ed. Springer US, Boston,  
631 MA.
- 632 Hartzfeld, P. W., R. Forkner, M. D. Hunter, and A. E. Hagerman. 2002. Determination of hydrolyzable tannins  
633 (gallotannins and ellagitannins) after reaction with potassium iodate. J. Agric. Food. Chem. 50:1785-  
634 1790. <http://doi.org/10.1021/jf0111155>
- 635 Harun, N. L. A., A. R. Alimon, M. F. Jahromi, and A. A. Samsudin. 2017. Effects of feeding goats with *Leucaena*  
636 *leucocephala* and *Manihot esculenta* leaves supplemented diets on rumen fermentation profiles,  
637 urinary purine derivatives and rumen microbial population. J. Appl. Anim. Res. 45:409-416.  
638 <http://doi.org/10.1080/09712119.2016.1205499>
- 639 Hassanat, F. and C. Benchaar. 2013. Assessment of the effect of condensed (acacia and quebracho) and  
640 hydrolysable (chestnut and valonea) tannins on rumen fermentation and methane production in vitro.  
641 J. Sci. Food Agric. 93:332-339. <http://doi.org/10.1002/jsfa.5763>
- 642 Jackson, F. S., T. N. Barry, C. Lascano, and B. Palmer. 1996. The extractable and bound condensed tannin  
643 content of leaves from tropical tree, shrub and forage legumes. J. Sci. Food Agric. 71:103-110.  
644 [http://doi.org/10.1002/\(Sici\)1097-0010\(199605\)71:1<103::Aid-Jsfa554>3.0.Co;2-8](http://doi.org/10.1002/(Sici)1097-0010(199605)71:1<103::Aid-Jsfa554>3.0.Co;2-8)
- 645 Jayanegara, A., G. Goel, H. P. S. Makkar, and K. Becker. 2015. Divergence between purified hydrolysable and  
646 condensed tannin effects on methane emission, rumen fermentation and microbial population in  
647 vitro. Anim. Feed Sci. Technol. 209:60-68. <http://doi.org/10.1016/j.anifeedsci.2015.08.002>
- 648 Jeraldo, P., K. Kalari, X. Chen, J. Bhavsar, A. Mangalam, B. White, H. Nelson, J. P. Kocher, and N. Chia. 2014. IM-  
649 TORNADO: a tool for comparison of 16S reads from paired-end libraries. PLoS One 9:e114804.  
650 <http://doi.org/10.1371/journal.pone.0114804>
- 651 Khazaal, K., X. Markantonatos, A. Nastis, and E. R. Ørskov. 1993. Changes with maturity in fibre composition  
652 and levels of extractable polyphenols in Greek browse: Effects on in vitro gas production and in sacco  
653 dry matter degradation. J. Sci. Food Agric. 63:237-244. <http://doi.org/10.1002/jsfa.2740630210>
- 654 Kristensen, E. S., P. Moller, and T. Hvelplund. 1982. Estimation of the effective protein degradability in the  
655 rumen of cows using the nylon bag technique combined with the outflow rate. Acta Agric. Scand. A  
656 Anim. Sci. 32:123-127. <http://doi.org/10.1080/00015128209435738>
- 657 Le Bourvellec, C. and C. M. G. C. Renard. 2019. Interactions between polyphenols and macromolecules: effect  
658 of tannin structure. Pages 515-521 in Encyclopedia of Food Chemistry. L. Melton, F. Shahidi, and P.  
659 Varelis, ed. Academic Press, Oxford.
- 660 Marie-Magdeleine, C., M. Boval, L. Philibert, A. Borde, and H. Archimède. 2010. Effect of banana foliage (*Musa*  
661 *x paradisiaca*) on nutrition, parasite infection and growth of lambs. Livest. Sci. 131:234-239.  
662 <http://doi.org/10.1016/j.livsci.2010.04.006>
- 663 Mayorga, O. L., A. H. Kingston-Smith, E. J. Kim, G. G. Allison, T. J. Wilkinson, M. J. Hegarty, M. K. Theodorou, C. J.  
664 Newbold, and S. A. Huws. 2016. Temporal metagenomic and metabolomic characterization of fresh  
665 perennial ryegrass degradation by rumen bacteria. Front. Microbiol. 7:23.  
666 <http://doi.org/10.3389/fmicb.2016.01854>
- 667 McAllister, T. A., T. Martinez, H. D. Bae, A. D. Muir, L. J. Yanke, and G. A. Jones. 2005. Characterization of  
668 condensed tannins purified from legume forages: chromophore production, protein precipitation, and  
669 inhibitory effects on cellulose digestion. J. Chem. Ecol. 31:2049-2068. [http://doi.org/10.1007/s10886-  
670 005-6077-4](http://doi.org/10.1007/s10886-005-6077-4)
- 671 McSweeney, C. S., B. Palmer, R. Bunch, and D. O. Krause. 2001a. Effect of the tropical forage calliandra on  
672 microbial protein synthesis and ecology in the rumen. J. Appl. Microbiol. 90:78-88.  
673 <http://doi.org/10.1046/j.1365-2672.2001.01220.x>

- 674 McSweeney, C. S., B. Palmer, D. M. McNeill, and D. O. Krause. 2001b. Microbial interactions with tannins:  
675 nutritional consequences for ruminants. *Anim. Feed Sci. Technol.* 91:83-93.  
676 [http://doi.org/10.1016/S0377-8401\(01\)00232-2](http://doi.org/10.1016/S0377-8401(01)00232-2)
- 677 Morgavi, D. P., C. Martin, and H. Boudra. 2013. Fungal secondary metabolites from *Monascus* spp. reduce  
678 rumen methane production in vitro and in vivo. *J. Anim. Sci.* 91:848-860.  
679 <http://doi.org/10.2527/jas.2012-5665>
- 680 Mueller-Harvey, I., G. Bee, F. Dohme-Meier, H. Hoste, M. Karonen, R. Kolliker, A. Luscher, V. Niderkorn, W. F.  
681 Pellikaan, J. P. Salminen, L. Skot, L. M. J. Smith, S. M. Thamsborg, P. Totterdell, I. Wilkinson, A. R.  
682 Williams, B. N. Azuhwi, N. Baert, A. G. Brinkhaus, G. Copani, O. Desrues, C. Drake, M. Engstrom, C.  
683 Frygas, M. Girard, N. T. Huyen, K. Kempf, C. Malisch, M. Mora-Ortiz, J. Quijada, A. Ramsay, H. M.  
684 Ropiak, and G. C. Waghorn. 2019. Benefits of condensed tannins in forage legumes fed to ruminants:  
685 importance of structure, concentration, and diet composition. *Crop Science* 59:861-885.  
686 <http://doi.org/10.2135/cropsci2017.06.0369>
- 687 Mueller-Harvey, I. and A. McAllan. 1992. Tannins: their biochemistry and nutritional properties. Pages 151-217  
688 in *Advances in plant cell biochemistry and biotechnology*. Vol. 1. I. M. Morrison, ed. JAI Press, London.
- 689 Muhammed, S., C. S. Stewart, and T. Acamovic. 1995. Effects of tannic acid, ellagic acid, gallic acid and catechin  
690 on cellulose degradation by the rumen fungus *Neocallimastix frontalis* strain rel. *Anim. Sci.* 1995:147-  
691 147. <http://doi.org/10.1017/S0308229600029135>
- 692 Naumann, H., R. Sepela, A. Rezaire, S. E. Masih, W. E. Zeller, L. A. Reinhardt, J. T. Robe, M. L. Sullivan, and A. E.  
693 Hagerman. 2018. Relationships between structures of condensed tannins from texas legumes and  
694 methane production during in vitro rumen digestion. *Molecules* 23:2123. <http://doi.org/ARTN> 2123  
695 10.3390/molecules23092123
- 696 Oksanen, J., F. G. Blanchet, M. Friendly, R. Kindt, P. Legendre, D. McGlenn, P. R. Minchin, R. B. O'Hara, G. L.  
697 Simpson, P. Solymos, M. H. H. Stevens, E. Szoecs, and H. Wagner. 2016. vegan: Community Ecology  
698 Package. R package version 2.4-1. <https://CRAN.R-project.org/package=vegan>.
- 699 Patra, A. K., B.-R. Min, and J. Saxena. 2012. Dietary tannins on microbial ecology of the gastrointestinal tract in  
700 ruminants. Pages 237-262 in *Dietary phytochemicals and microbes*. A. K. Patra, ed. Springer.
- 701 Patra, A. K. and J. Saxena. 2011. Exploitation of dietary tannins to improve rumen metabolism and ruminant  
702 nutrition. *J. Sci. Food Agric.* 91:24-37. <http://doi.org/10.1002/jsfa.4152>
- 703 Paulson, J. N., O. C. Stine, H. C. Bravo, and M. Pop. 2013. Differential abundance analysis for microbial marker-  
704 gene surveys. *Nat. Methods* 10:1200-1202. <http://doi.org/10.1038/nmeth.2658>
- 705 Perez-Maldonado, R. and B. Norton. 1996. Digestion of 14 C-labelled condensed tannins from *Desmodium*  
706 *intortum* in sheep and goats. *Br. J. Nutr.* 76:501-513. <http://doi.org/10.1079/BJN19960059>
- 707 Piluzza, G., L. Sulas, and S. Bullitta. 2014. Tannins in forage plants and their role in animal husbandry and  
708 environmental sustainability: a review. *Grass Forage Sci.* 69:32-48. <http://doi.org/10.1111/gfs.12053>
- 709 Popova, M., J. Guyader, M. Silberberg, A. R. Seradj, C. Saro, A. Bernard, C. Gérard, C. Martin, and D. P. Morgavi.  
710 2019. Changes in the rumen microbiota of cows in response to dietary supplementation with nitrate,  
711 linseed, and saponin alone or in combination. *Appl. Environ. Microbiol.* 85:e02657-02618.  
712 <http://doi.org/10.1128/aem.02657-18>
- 713 Rira, M., D. P. Morgavi, H. Archimède, C. Marie-Magdeleine, M. Popova, H. Bousseboua, and M. Doreau. 2015.  
714 Potential of tannin-rich plants for modulating ruminal microbes and ruminal fermentation in sheep. *J.*  
715 *Anim. Sci.* 93:334-347. <http://doi.org/10.2527/jas.2014-7961>
- 716 Rira, M., D. P. Morgavi, L. Genestoux, S. Djibiri, I. Sekhri, and M. Doreau. 2019. Methanogenic potential of  
717 tropical feeds rich in hydrolysable tannins. *J. Anim. Sci.* 97:2700-2710.  
718 <http://doi.org/10.1093/jas/skz199>

- 719 Rittner, U. and J. D. Reed. 1992. Phenolics and in-vitro degradability of protein and fibre in West African  
720 Browse. *J. Sci. Food Agric.* 58:21-28. <http://doi.org/https://doi.org/10.1002/jsfa.2740580105>
- 721 Roothaert, R. L. and R. T. Paterson. 1997. Recent work on the production and utilization of tree fodder in East  
722 Africa. *Anim. Feed Sci. Technol.* 69:39-51. [http://doi.org/https://doi.org/10.1016/S0377-  
723 8401\(97\)81621-5](http://doi.org/https://doi.org/10.1016/S0377-8401(97)81621-5)
- 724 Rubanza, C., M. Shem, R. Otsyina, S. Bakengesa, T. Ichinohe, and T. Fujihara. 2005. Polyphenolics and tannins  
725 effect on in vitro digestibility of selected *Acacia* species leaves. *Anim. Feed Sci. Technol.* 119:129-142.  
726 <http://doi.org/10.1016/j.anifeedsci.2004.12.004>
- 727 Salami, S. A., B. Valenti, M. Bella, M. N. O'Grady, G. Luciano, J. P. Kerry, E. Jones, A. Priolo, and C. J. Newbold.  
728 2018. Characterisation of the ruminal fermentation and microbiome in lambs supplemented with  
729 hydrolysable and condensed tannins. *FEMS Microbiol. Ecol.* 94. <http://doi.org/10.1093/femsec/fiy061>
- 730 Saro, C., U. M. Hohenester, M. Bernard, M. Lagrée, C. Martin, M. Doreau, H. Boudra, M. Popova, and D. P.  
731 Morgavi. 2018. Effectiveness of interventions to modulate the rumen microbiota composition and  
732 function in pre-ruminant and ruminant lambs. *Front. Microbiol.* 9:1273.  
733 <http://doi.org/10.3389/fmicb.2018.01273>
- 734 Schofield, P., D. M. Mbugua, and A. N. Pell. 2001. Analysis of condensed tannins: a review. *Anim. Feed Sci.*  
735 *Technol.* 91:21-40. [http://doi.org/10.1016/S0377-8401\(01\)00228-0](http://doi.org/10.1016/S0377-8401(01)00228-0)
- 736 Seedorf, H., S. Kittelmann, G. Henderson, and P. H. Janssen. 2014. RIM-DB: a taxonomic framework for  
737 community structure analysis of methanogenic archaea from the rumen and other intestinal  
738 environments. *PeerJ* 2:e494. <http://doi.org/10.7717/peerj.494>
- 739 Terrill, T. H., A. M. Rowan, G. B. Douglas, and T. N. Barry. 1992. Determination of extractable and bound  
740 condensed tannin concentrations in forage plants, protein concentrate meals and cereal grains. *J. Sci.*  
741 *Food Agric.* 58:321-329. <http://doi.org/10.1002/jsfa.2740580306>
- 742 Yu, Z. and M. Morrison. 2004. Improved extraction of PCR-quality community DNA from digesta and fecal  
743 samples. *BioTechniques* 36:808-812. <http://doi.org/10.2144/04365ST04>
- 744

745

Table 1. Chemical composition and enzymatic digestibility, in g/kg DM, of plants used in experiments

|                            | Control<br>hay<br>Exp. 1 | Control<br>hay<br>Exp. 2 | <i>Acacia<br/>nilotica</i><br>pods | <i>Calliandra<br/>calothyrsus</i><br>leaves | <i>Gliricidia<br/>sepium</i><br>leaves | <i>Leucaena<br/>leucocephala</i><br>leaves | <i>Manihot<br/>esculenta</i><br>leaves | <i>Musa spp</i><br>leaves |
|----------------------------|--------------------------|--------------------------|------------------------------------|---------------------------------------------|----------------------------------------|--------------------------------------------|----------------------------------------|---------------------------|
| Organic matter             | 915                      | 927                      | 956                                | 956                                         | 891                                    | 897                                        | 914                                    | 895                       |
| Crude protein              | 83                       | 84                       | 140                                | 217                                         | 250                                    | 336                                        | 294                                    | 69                        |
| NDF                        | 625                      | 701                      | 227                                | 333                                         | 240                                    | 223                                        | 285                                    | 653                       |
| ADF                        | 351                      | 326                      | 152                                | 228                                         | 147                                    | 125                                        | 202                                    | 349                       |
| ADL                        | 44                       | 20                       | 38                                 | 63                                          | 57                                     | 46                                         | 69                                     | 63                        |
| Total condensed tannins    | ND <sup>1</sup>          | ND                       | 157                                | 361                                         | 112                                    | 180                                        | 166                                    | 128                       |
| Free                       | ND                       | ND                       | 91                                 | 194                                         | 5                                      | 54                                         | 59                                     | 38                        |
| Linked to protein          | ND                       | ND                       | 51                                 | 125                                         | 69                                     | 83                                         | 95                                     | 57                        |
| Linked to fibre            | ND                       | ND                       | 15                                 | 42                                          | 38                                     | 43                                         | 12                                     | 33                        |
| Hydrolysable tannins       | ND                       | ND                       | 350                                | 33                                          | 9                                      | 13                                         | 12                                     | 4                         |
| Gallotannins               | ND                       | ND                       | 84                                 | 6                                           | Traces                                 | Traces                                     | Traces                                 | Traces                    |
| Ellagitannins              | ND                       | ND                       | 266                                | 27                                          | 9                                      | 13                                         | 12                                     | 4                         |
| Enzymatic DM digestibility | - <sup>2</sup>           | 529                      | 720                                | 406                                         | 714                                    | 745                                        | 668                                    | 359                       |

746

<sup>1</sup>ND: not detected

747

<sup>2</sup>Not measured

748

Control hay Exp. 1: Natural grassland hay harvested in Auvergne, France

749

Control hay Exp. 2: Natural grassland hay based on *Dichanthium spp.* harvested in Guadeloupe, French West Indies

750 **Table 2.** Dry matter, N and NDF degradability<sup>1</sup> of tropical tannin-rich plants in the rumen

|                          | <i>Acacia nilotica</i> | <i>Calliandra calothyrsus</i> | <i>Gliricidia sepium</i> | <i>Leucaena leucocephala</i> | <i>Manihot esculenta</i> | <i>Musa spp</i>     | SEM    | P Value |
|--------------------------|------------------------|-------------------------------|--------------------------|------------------------------|--------------------------|---------------------|--------|---------|
| Dry matter degradability |                        |                               |                          |                              |                          |                     |        |         |
| a (%)                    | 53.5 <sup>a</sup>      | 22.1 <sup>e</sup>             | 49.5 <sup>b</sup>        | 37.3 <sup>c</sup>            | 39.2 <sup>c</sup>        | 27.7 <sup>d</sup>   | 0.88   | < 0.001 |
| b (%)                    | 30.4 <sup>b</sup>      | 25.2 <sup>b</sup>             | 27.6 <sup>b</sup>        | 45.7 <sup>a</sup>            | 41.4 <sup>a</sup>        | 14.0 <sup>c</sup>   | 1.86   | < 0.001 |
| c (h <sup>-1</sup> )     | 0.038 <sup>ab</sup>    | 0.022 <sup>b</sup>            | 0.170 <sup>ab</sup>      | 0.075 <sup>ab</sup>          | 0.189 <sup>a</sup>       | 0.027 <sup>b</sup>  | 0.0337 | 0.013   |
| L (h)                    | 4.24 <sup>ab</sup>     | 0.00 <sup>b</sup>             | 5.84 <sup>a</sup>        | 2.68 <sup>ab</sup>           | 5.95 <sup>a</sup>        | 4.90 <sup>ab</sup>  | 1.595  | 0.026   |
| TDm <sup>2</sup> (%)     | 65.2 <sup>a</sup>      | 30.9 <sup>c</sup>             | 65.6 <sup>a</sup>        | 63.3 <sup>b</sup>            | 66.0 <sup>a</sup>        | 32.2 <sup>c</sup>   | 0.46   | < 0.001 |
| TDs <sup>2</sup> (%)     | 65.7 <sup>a</sup>      | 32.0 <sup>b</sup>             | 65.1 <sup>a</sup>        | 63.8 <sup>a</sup>            | 65.5 <sup>a</sup>        | 33.2 <sup>b</sup>   | 0.70   | < 0.001 |
| N degradability          |                        |                               |                          |                              |                          |                     |        |         |
| a (%)                    | 40.1 <sup>b</sup>      | 24.7 <sup>e</sup>             | 37.8 <sup>bc</sup>       | 35.6 <sup>c</sup>            | 47.5 <sup>a</sup>        | 29.7 <sup>d</sup>   | 0.74   | < 0.001 |
| b (%)                    | 58.6 <sup>a</sup>      | 45.1 <sup>ab</sup>            | 47.3 <sup>a</sup>        | 54.6 <sup>a</sup>            | 45.0 <sup>ab</sup>       | 13.4 <sup>b</sup>   | 6.29   | 0.004   |
| c (h <sup>-1</sup> )     | 0.031 <sup>bc</sup>    | 0.013 <sup>c</sup>            | 0.076 <sup>b</sup>       | 0.054 <sup>bc</sup>          | 0.155 <sup>a</sup>       | 0.025 <sup>bc</sup> | 0.0115 | < 0.001 |
| L (h)                    | 1.88 <sup>bc</sup>     | 0.00 <sup>c</sup>             | 5.95 <sup>a</sup>        | 0.52 <sup>c</sup>            | 5.40 <sup>ab</sup>       | 8.54 <sup>a</sup>   | 0.912  | < 0.001 |
| TDm <sup>2</sup> (%)     | 63.7 <sup>c</sup>      | 33.2 <sup>d</sup>             | 61.8 <sup>c</sup>        | 65.7 <sup>b</sup>            | 76.2 <sup>a</sup>        | 33.3 <sup>d</sup>   | 0.57   | < 0.001 |
| TDs <sup>2</sup> (%)     | 64.1 <sup>c</sup>      | 34.7 <sup>e</sup>             | 61.1 <sup>d</sup>        | 66.2 <sup>b</sup>            | 75.7 <sup>a</sup>        | 34.1 <sup>e</sup>   | 0.64   | < 0.001 |
| NDF degradability        |                        |                               |                          |                              |                          |                     |        |         |
| TDs <sup>2</sup> (%)     | 14.5 <sup>c</sup>      | 6.3 <sup>d</sup>              | 28.4 <sup>b</sup>        | 30.0 <sup>b</sup>            | 35.8 <sup>a</sup>        | 30.7 <sup>ab</sup>  | 1.27   | < 0.001 |

751 <sup>a - d</sup>Values within a row with different superscripts differ significantly at P<0.05.

752 <sup>1</sup> Degradation D was modelled according to the equation  $D(t) = a + b(1 - e^{-c(t+L)})$  where a is the rapidly degraded fraction, b the slowly degraded fraction, c the rate of degradation of fraction b, t the time of incubation in the rumen and L the lag time.

753 <sup>2</sup> TDm : theoretical degradability calculated according to the model ; TDs : theoretical degradability calculated according to a stepwise calculation.

754

755

756

757

758 **Table 3.** Rumen disappearance (%) of condensed tannins, N and NDF from tropical tannin-rich plants after 24 h of incubation

|                   | <i>Acacia nilotica</i> | <i>Calliandra calothyrsus</i> | <i>Gliricidia sepium</i> | <i>Leucaena leucocephala</i> | <i>Manihot esculenta</i> | <i>Musa spp</i>    | SEM  | P Value |
|-------------------|------------------------|-------------------------------|--------------------------|------------------------------|--------------------------|--------------------|------|---------|
| Condensed tannins | 73.0 <sup>d</sup>      | 58.2 <sup>e</sup>             | 94.9 <sup>a</sup>        | 77.8 <sup>cd</sup>           | 88.6 <sup>ab</sup>       | 84.3 <sup>bc</sup> | 2.10 | <0.001  |
| Free              | 98.3                   | 97.4                          | 100.0                    | 100.0                        | 100.0                    | 100.0              | -    | -       |
| Linked to protein | 21.3 <sup>d</sup>      | -7.8 <sup>e</sup>             | 92.9 <sup>a</sup>        | 58.0 <sup>c</sup>            | 83.0 <sup>ab</sup>       | 72.7 <sup>bc</sup> | 3.24 | <0.001  |
| Linked to fibre   | 83.0                   | 60.8                          | 98.0                     | 87.9                         | 76.4                     | 86.4               | 8.23 | 0.10    |
| N                 | 65.3 <sup>b</sup>      | 31.7 <sup>c</sup>             | 68.8 <sup>b</sup>        | 73.9 <sup>b</sup>            | 89.1 <sup>a</sup>        | 33.8 <sup>c</sup>  | 2.93 | 0.001   |
| NDF               | 11.5 <sup>ab</sup>     | 5.1 <sup>b</sup>              | 31.6 <sup>ab</sup>       | 33.8 <sup>ab</sup>           | 43.4 <sup>a</sup>        | 27.8 <sup>ab</sup> | 8.21 | 0.012   |

<sup>a-d</sup>Values within a row with different superscripts differ significantly at P<0.05.

759  
760  
761



762 **Table 4.** Relative abundance of rumen bacterial phyla colonizing tropical tannin-rich plants incubated in the rumen of cows (n= 3) for 3 and 12 h

|                          | Control <sup>1</sup> | <i>Acacia nilotica</i> | <i>Calliandra calothyrsus</i> | <i>Gliricidia sepium</i> | <i>Leucaena Leucocephala</i> | <i>Manihot esculenta</i> | <i>Musa spp</i> | P value | FRD <sup>2</sup> |
|--------------------------|----------------------|------------------------|-------------------------------|--------------------------|------------------------------|--------------------------|-----------------|---------|------------------|
| After 3 h of incubation  |                      |                        |                               |                          |                              |                          |                 |         |                  |
| <i>Firmicutes</i>        | 47.61                | 41.16                  | 43.47                         | 57.90                    | 60.08                        | 43.58                    | 50.26           | 0.554   | 0.727            |
| <i>Bacteroidetes</i>     | 36.59                | 37.89                  | 42.87                         | 32.39                    | 29.41                        | 42.71                    | 32.71           | 0.375   | 0.687            |
| <i>Fibrobacteres</i>     | 11.53                | 2.12                   | 3.87                          | 5.19                     | 3.50                         | 8.13                     | 12.88           | 0.089   | 0.327            |
| <i>Spirochaetae</i>      | 1.53                 | 1.68                   | 3.24                          | 1.47                     | 2.30                         | 3.39                     | 1.57            | 0.464   | 0.727            |
| <i>Actinobacteria</i>    | 1.52                 | 6.46                   | 2.52                          | 1.75                     | 1.25                         | 0.92                     | 1.84            | 0.221   | 0.607            |
| <i>Proteobacteria</i>    | 0.52                 | 9.77                   | 3.15                          | 0.70                     | 2.95                         | 0.43                     | 0.33            | 0.015   | 0.083            |
| <i>Tenericutes</i>       | 0.46                 | 0.84                   | 0.74                          | 0.40                     | 0.34                         | 0.63                     | 0.22            | 0.868   | 0.868            |
| <i>Chloroflexi</i>       | 0.25                 | 0.08                   | 0.14                          | 0.19                     | 0.15                         | 0.21                     | 0.19            | 0.595   | 0.727            |
| After 12 h of incubation |                      |                        |                               |                          |                              |                          |                 |         |                  |
| <i>Firmicutes</i>        | 38.54                | 55.98                  | 45.32                         | 54.81                    | 43.48                        | 35.15                    | 40.42           | 0.592   | 0.609            |
| <i>Bacteroidetes</i>     | 30.78                | 29.22                  | 32.76                         | 27.63                    | 34.39                        | 33.63                    | 28.41           | 0.093   | 0.249            |
| <i>Fibrobacteres</i>     | 26.76a               | 2.72d                  | 5.88c                         | 11.09b                   | 13.93b                       | 11.02b                   | 23.15a          | 0.006   | 0.045            |
| <i>Spirochaetae</i>      | 1.94                 | 5.17                   | 7.53                          | 3.20                     | 5.37                         | 13.89                    | 7.13            | 0.609   | 0.609            |
| <i>Tenericutes</i>       | 0.93                 | 5.31                   | 7.50                          | 2.57                     | 2.45                         | 5.93                     | 0.38            | 0.076   | 0.249            |
| <i>Actinobacteria</i>    | 0.65                 | 0.32                   | 0.37                          | 0.36                     | 0.10                         | 0.19                     | 0.31            | 0.550   | 0.609            |
| <i>Proteobacteria</i>    | 0.25                 | 1.24                   | 0.46                          | 0.22                     | 0.20                         | 0.11                     | 0.11            | 0.155   | 0.309            |
| <i>Chloroflexi</i>       | 0.16                 | 0.05                   | 0.18                          | 0.10                     | 0.07                         | 0.09                     | 0.09            | 0.484   | 0.609            |

763 <sup>1</sup>Control: Natural grassland hay harvested in Auvergne, France

764 <sup>2</sup>FDR= false discovery rate post-hoc adjustment

765

766

767 **Table 5.** *In vitro* ruminal fermentation of tropical tannin-rich plants

|                                               | Control <sup>1</sup> | <i>Acacia nilotica</i> | <i>Calliandra calothyrsus</i> | <i>Gliricidia sepium</i> | <i>Leucaena leucocephala</i> | <i>Manihot esculenta</i> | <i>Musa spp</i>     | SEM   | P value |
|-----------------------------------------------|----------------------|------------------------|-------------------------------|--------------------------|------------------------------|--------------------------|---------------------|-------|---------|
| Total gas production (mL / 24 h)              | 34.41 <sup>a</sup>   | 23.26 <sup>c</sup>     | 16.25 <sup>d</sup>            | 28.01 <sup>b</sup>       | 24.28 <sup>bc</sup>          | 27.95 <sup>b</sup>       | 11.90 <sup>d</sup>  | 1.630 | < 0.001 |
| Total VFA <sup>2</sup> production (mM / 24 h) | 45.61 <sup>a</sup>   | 31.98 <sup>bc</sup>    | 27.14 <sup>c</sup>            | 52.49 <sup>a</sup>       | 41.53 <sup>ab</sup>          | 48.11 <sup>a</sup>       | 31.96 <sup>bc</sup> | 3.251 | < 0.001 |
| VFA composition (%)                           |                      |                        |                               |                          |                              |                          |                     |       |         |
| Acetate                                       | 54.15 <sup>b</sup>   | 68.05 <sup>a</sup>     | 65.01 <sup>a</sup>            | 63.56 <sup>a</sup>       | 61.21 <sup>ab</sup>          | 64.92 <sup>a</sup>       | 62.79 <sup>ab</sup> | 2.079 | 0.003   |
| Propionate                                    | 19.08 <sup>ab</sup>  | 18.07 <sup>b</sup>     | 19.43 <sup>ab</sup>           | 18.34 <sup>b</sup>       | 23.67 <sup>a</sup>           | 17.20 <sup>b</sup>       | 18.20 <sup>b</sup>  | 1.084 | 0.010   |
| Butyrate                                      | 19.92 <sup>a</sup>   | 6.28 <sup>bc</sup>     | 5.32 <sup>c</sup>             | 9.21 <sup>ab</sup>       | 6.50 <sup>bc</sup>           | 8.28 <sup>bc</sup>       | 6.77 <sup>bc</sup>  | 0.861 | < 0.001 |
| Isobutyrate                                   | 1.40 <sup>bc</sup>   | 0.92 <sup>c</sup>      | 2.24 <sup>ab</sup>            | 2.19 <sup>a</sup>        | 1.78 <sup>bc</sup>           | 2.25 <sup>ab</sup>       | 2.97 <sup>a</sup>   | 0.319 | < 0.001 |
| Isovalerate                                   | 2.30 <sup>b</sup>    | 2.26 <sup>b</sup>      | 4.24 <sup>a</sup>             | 3.19 <sup>ab</sup>       | 3.13 <sup>ab</sup>           | 3.52 <sup>ab</sup>       | 4.28 <sup>a</sup>   | 0.761 | 0.005   |
| Valerate                                      | 2.91 <sup>b</sup>    | 4.28 <sup>ab</sup>     | 3.46 <sup>ab</sup>            | 3.30 <sup>ab</sup>       | 3.52 <sup>ab</sup>           | 3.67 <sup>ab</sup>       | 4.64 <sup>a</sup>   | 0.469 | 0.010   |
| Caproate                                      | 0.25 <sup>abc</sup>  | 0.13 <sup>c</sup>      | 0.29 <sup>ab</sup>            | 0.21 <sup>abc</sup>      | 0.20 <sup>abc</sup>          | 0.16 <sup>bc</sup>       | 0.35 <sup>a</sup>   | 0.045 | 0.003   |
| Acetate:propionate                            | 2.88 <sup>a</sup>    | 3.90 <sup>a</sup>      | 3.41 <sup>a</sup>             | 3.49 <sup>a</sup>        | 2.59 <sup>a</sup>            | 3.78 <sup>a</sup>        | 3.47 <sup>a</sup>   | 0.281 | 0.038   |
| (Acetate + butyrate):propionate               | 3.94 <sup>ab</sup>   | 4.25 <sup>ab</sup>     | 3.69 <sup>ab</sup>            | 3.99 <sup>ab</sup>       | 2.86 <sup>b</sup>            | 4.27 <sup>a</sup>        | 3.84 <sup>ab</sup>  | 0.301 | 0.060   |
| Fermented organic matter (mg / 24 h)          | 177 <sup>a</sup>     | 112 <sup>bc</sup>      | 90 <sup>c</sup>               | 180 <sup>a</sup>         | 142 <sup>ab</sup>            | 165 <sup>a</sup>         | 105 <sup>bc</sup>   | 11.3  | < 0.001 |
| Fermented organic matter (% OM)               | 47.3 <sup>ab</sup>   | 28.8 <sup>cd</sup>     | 23.4 <sup>d</sup>             | 51.0 <sup>a</sup>        | 39.0 <sup>bc</sup>           | 44.9 <sup>ab</sup>       | 29.9 <sup>cd</sup>  | 2.95  | < 0.001 |
| Methane production (mL / 24 h)                | 3.92 <sup>a</sup>    | 1.75 <sup>c</sup>      | 1.66 <sup>c</sup>             | 3.54 <sup>a</sup>        | 2.59 <sup>b</sup>            | 4.00 <sup>a</sup>        | 1.41 <sup>c</sup>   | 0.201 | < 0.001 |
| Methane production (mL/100 mM VFA)            | 8.69 <sup>a</sup>    | 5.52 <sup>b</sup>      | 6.49 <sup>ab</sup>            | 6.75 <sup>ab</sup>       | 6.35 <sup>ab</sup>           | 8.56 <sup>a</sup>        | 4.45 <sup>b</sup>   | 0.700 | 0.003   |

<sup>a - d</sup>Values within a row with different superscripts differ significantly at P<0.05.

<sup>1</sup>Control: Natural grassland hay based on *Dichanthium spp.* harvested in Guadeloupe, French West Indies.

<sup>2</sup>VFA: volatile fatty acids.

768  
769  
770  
771

772

773

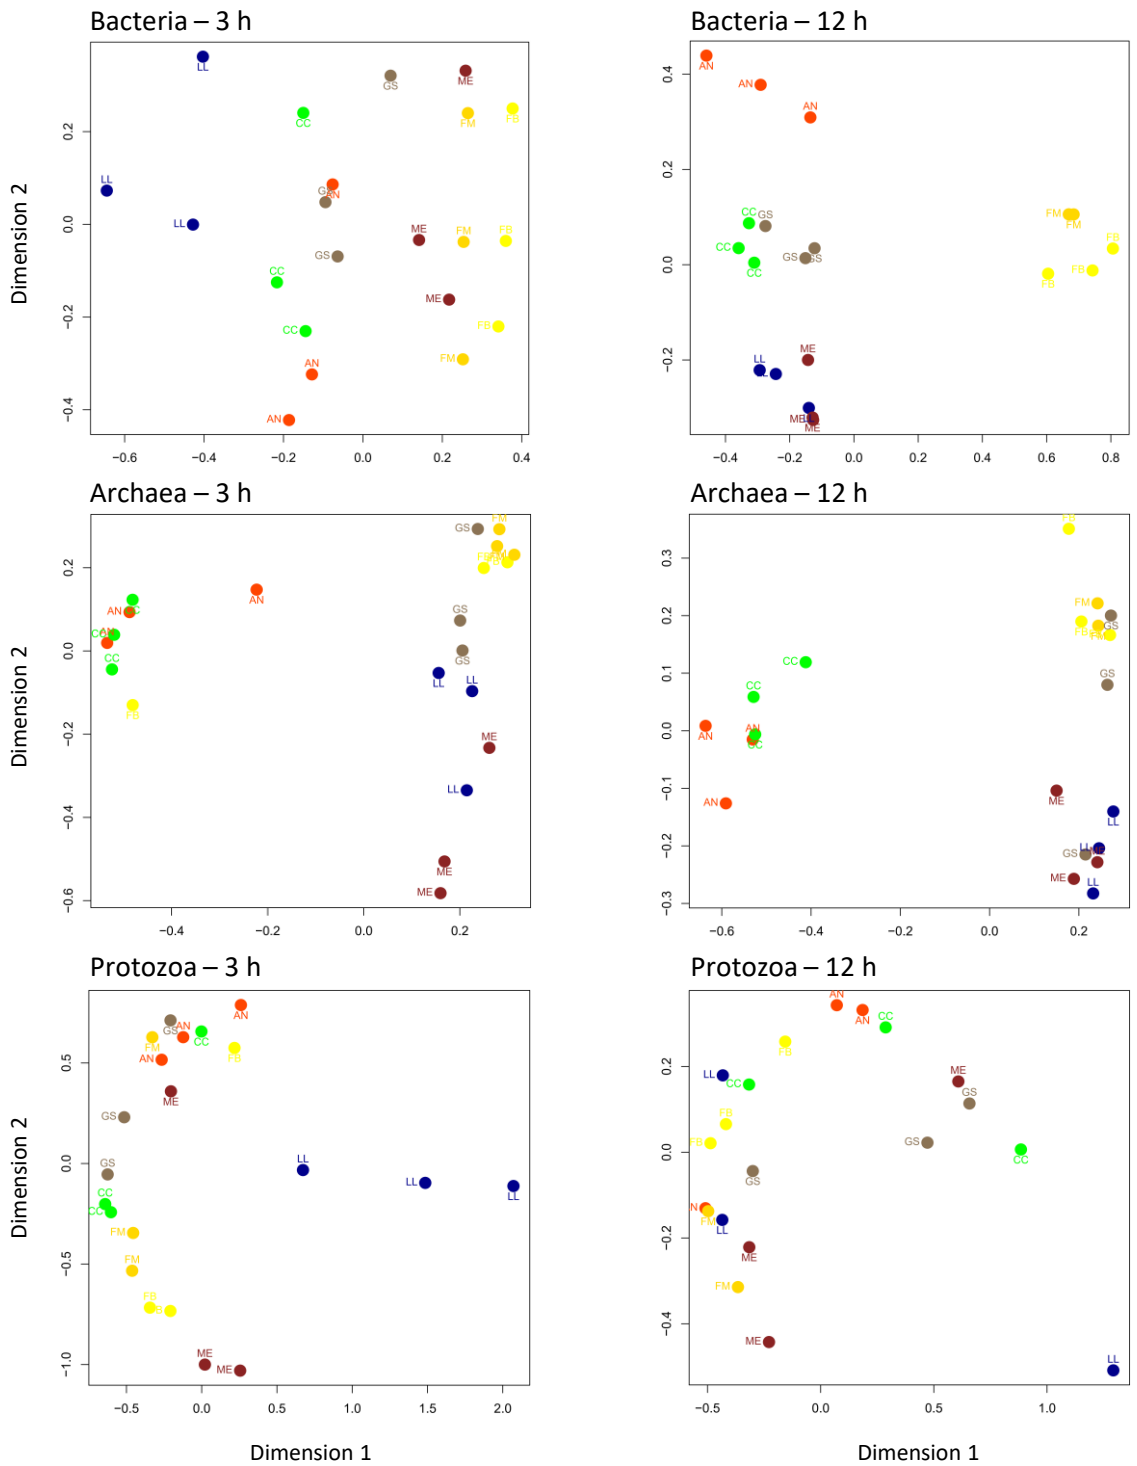

Figure 1. Distribution of bacterial, archaeal and protozoal communities associated to tropical tannin-rich plants after 3 and 12 h of incubation in the rumen (PCoA).

● = control hay (no tannin); ● = *Acacia nilotica*; ● = *Calliandra calothyrsus*; ● = *Gliricidia sepium*; ● = *Leucaena leucocephala*; ● = *Manihot esculenta*; ● = *Musa spp.*

## Supplementary information

**Supplementary Table 1.** Diversity indices for bacterial, archaeal and protozoal populations colonising tropical tannin-rich plants incubated in the rumen of cows (n= 3) for 3 and 12 h, statistical analysis was performed using the non parametric Kruskal-Wallis test

| Microbial type<br>Index | Incubation<br>time (h) | Control <sup>1</sup> | <i>Acacia<br/>nilotica</i> | <i>Calliandra<br/>calothyrsus</i> | <i>Gliricidia<br/>sepium</i> | <i>Leucaena<br/>leucocephala</i> | <i>Manihot<br/>esculenta</i> | <i>Musa spp</i> | SEM   | P     |
|-------------------------|------------------------|----------------------|----------------------------|-----------------------------------|------------------------------|----------------------------------|------------------------------|-----------------|-------|-------|
| Bacteria                |                        |                      |                            |                                   |                              |                                  |                              |                 |       |       |
| Shannon                 | 3                      | 4.57abc              | 4.55ab                     | 4.78a                             | 4.39bc                       | 4.44bc                           | 4.41bc                       | 4.31c           | 0.166 | 0.036 |
|                         | 12                     | 4.50                 | 4.35                       | 4.72                              | 4.28                         | 4.48                             | 4.49                         | 4.33            | 0.193 | 0.072 |
| Simpson                 | 3                      | 0.97abc              | 0.97ab                     | 0.98a                             | 0.96bc                       | 0.96abc                          | 0.97bc                       | 0.96c           | 0.009 | 0.049 |
|                         | 12                     | 0.96ab               | 0.96ab                     | 0.97a                             | 0.95b                        | 0.97a                            | 0.97a                        | 0.96ab          | 0.010 | 0.046 |
| Evenness                | 3                      | 0.76ab               | 0.80a                      | 0.81a                             | 0.73b                        | 0.76ab                           | 0.73b                        | 0.72b           | 0.036 | 0.014 |
|                         | 12                     | 0.75                 | 0.75                       | 0.79                              | 0.71                         | 0.74                             | 0.74                         | 0.73            | 0.028 | 0.099 |
| Richness                | 3                      | 266ab                | 269ab                      | 287a                              | 244bc                        | 251bc                            | 250bc                        | 236c            | 17.4  | 0.014 |
|                         | 12                     | 376                  | 331                        | 381                               | 339                          | 338                              | 346                          | 322             | 25.1  | 0.085 |
| Archaea                 |                        |                      |                            |                                   |                              |                                  |                              |                 |       |       |
| Shannon                 | 3                      | 5.82                 | 5.86                       | 5.67                              | 5.79                         | 5.80                             | 5.45                         | 5.75            | 0.231 | 0.74  |
|                         | 12                     | 6.10ab               | 5.65b                      | 5.84b                             | 6.10a                        | 6.17a                            | 5.94ab                       | 6.08ab          | 0.202 | 0.029 |
| Simpson                 | 3                      | 0.99                 | 0.99                       | 0.99                              | 0.98                         | 0.98                             | 0.98                         | 0.99            | 0.005 | 0.51  |
|                         | 12                     | 0.99abc              | 0.97c                      | 0.98bc                            | 0.99ab                       | 0.99a                            | 0.99ab                       | 0.99ab          | 0.007 | 0.034 |
| Evenness                | 3                      | 0.74                 | 0.75                       | 0.76                              | 0.72                         | 0.77                             | 0.75                         | 0.73            | 0.022 | 0.52  |
|                         | 12                     | 0.78abc              | 0.74c                      | 0.76bc                            | 0.80a                        | 0.79ab                           | 0.78abc                      | 0.77abc         | 0.018 | 0.022 |
| Richness                | 3                      | 1242                 | 1210                       | 1242                              | 1089                         | 983                              | 1147                         | 1192            | 110.4 | 0.20  |
|                         | 12                     | 1958a                | 1690b                      | 1778ab                            | 1944a                        | 1980a                            | 1807ab                       | 1958a           | 130.9 | 0.042 |
| Protozoa                |                        |                      |                            |                                   |                              |                                  |                              |                 |       |       |
| Shannon                 | 3                      | 2.08                 | 1.87                       | 2.04                              | 2.00                         | 1.96                             | 1.61                         | 1.53            | 0.284 | 0.12  |
|                         | 12                     | 1.67                 | 1.83                       | 2.19                              | 2.07                         | 1.92                             | 2.05                         | 1.94            | 0.230 | 0.26  |
| Simpson                 | 3                      | 0.82ab               | 0.76ab                     | 0.84a                             | 0.83a                        | 0.84a                            | 0.65b                        | 0.72b           | 0.087 | 0.040 |
|                         | 12                     | 0.67                 | 0.78                       | 0.85                              | 0.83                         | 0.80                             | 0.81                         | 0.77            | 0.066 | 0.13  |
| Evenness                | 3                      | 0.66ab               | 0.57b                      | 0.70ab                            | 0.69ab                       | 0.81a                            | 0.53b                        | 0.51b           | 0.116 | 0.025 |
|                         | 12                     | 0.53                 | 0.58                       | 0.73                              | 0.72                         | 0.69                             | 0.68                         | 0.60            | 0.098 | 0.11  |
| Richness                | 3                      | 25ab                 | 20a                        | 23ab                              | 22ab                         | 14b                              | 22a                          | 23a             | 3.520 | 0.031 |
|                         | 12                     | 21                   | 20                         | 20                                | 17                           | 16                               | 21                           | 23              | 2.739 | 0.16  |

<sup>1</sup>Control: Natural grassland hay based on *Dichanthium spp.* harvested in Guadeloupe, French West Indies

**Supplementary Table 2.** Proportional abundance of bacterial taxa colonising tropical tannin-rich plants incubated in the rumen of cows (n= 3) for 3 h

|                                                      | Control <sup>1</sup> | <i>Acacia nilotica</i> | <i>Calliandra calothyrsus</i> | <i>Gliricidia sepium</i> | <i>Leucaena leucocephala</i> | <i>Manihot esculenta</i> | <i>Musa spp</i> | P value <sup>2</sup> | FRD   |
|------------------------------------------------------|----------------------|------------------------|-------------------------------|--------------------------|------------------------------|--------------------------|-----------------|----------------------|-------|
| Uncultured_rumen_bacterium                           | 62.8                 | 60.6                   | 60.7                          | 67.3                     | 57.7                         | 67.6                     | 67.0            | 0.498                | 0.755 |
| <i>Fibrobacter</i> _unclassified                     | 9.8                  | 1.7                    | 3.0                           | 4.8                      | 3.0                          | 7.2                      | 10.8            | 0.030                | 0.248 |
| <i>Streptococcus</i> _unclassified                   | 4.2                  | 0.2                    | 0.1                           | 0.8                      | 0.3                          | 0.1                      | 0.5             | 0.451                | 0.747 |
| <i>Prevotella</i> _1_unclassified                    | 4.0                  | 3.2                    | 4.3                           | 3.8                      | 2.6                          | 4.2                      | 3.3             | 0.318                | 0.722 |
| Uncultured_rumen_bacterium_unclassified              | 3.0                  | 6.6                    | 5.4                           | 3.3                      | 2.6                          | 2.5                      | 2.2             | 0.878                | 0.934 |
| Uncultured_bacterium                                 | 2.9                  | 3.3                    | 4.3                           | 3.1                      | 2.9                          | 3.7                      | 2.7             | 0.193                | 0.653 |
| <i>Butyrivibrio</i> _2_unclassified                  | 1.8                  | 1.3                    | 4.5                           | 4.4                      | 7.0                          | 3.3                      | 1.4             | 0.003                | 0.041 |
| <i>Christensenellaceae</i> _R_7_group_unclassified   | 1.4                  | 1.7                    | 1.5                           | 1.5                      | 0.9                          | 1.6                      | 1.5             | 0.622                | 0.864 |
| <i>Ruminococcus flavefaciens</i>                     | 0.8                  | 0.8                    | 0.5                           | 0.5                      | 0.4                          | 0.9                      | 1.6             | 0.705                | 0.904 |
| <i>Prevotella ruminicola</i>                         | 0.8                  | 1.2                    | 1.7                           | 1.0                      | 1.4                          | 1.5                      | 0.9             | 0.306                | 0.722 |
| <i>Oribacterium</i> _unclassified                    | 0.6                  | 0.3                    | 1.2                           | 1.6                      | 3.9                          | 0.8                      | 0.4             | 0.005                | 0.047 |
| Uncultured_rumen_bacterium_5C0d_11                   | 0.5                  | 0.2                    | 0.3                           | 0.2                      | 0.3                          | 0.3                      | 0.6             | 0.694                | 0.904 |
| Uncultured_bacterium_unclassified                    | 0.5                  | 1.9                    | 1.3                           | 0.4                      | 0.7                          | 0.3                      | 0.5             | 0.821                | 0.933 |
| Unidentified_rumen_bacterium_RC2                     | 0.5                  | 0.3                    | 0.5                           | 0.2                      | 0.4                          | 0.2                      | 0.3             | 0.108                | 0.542 |
| Uncultured_rumen_bacterium_4C28d_15_unclassified     | 0.4                  | 0.2                    | 0.1                           | 0.0                      | 0.1                          | 0.1                      | 0.1             | 0.389                | 0.747 |
| <i>Selenomonas</i> _1_unclassified                   | 0.4                  | 0.5                    | 0.8                           | 0.4                      | 2.0                          | 0.2                      | 0.1             | 0.921                | 0.940 |
| <i>Ruminococcus</i> _sp_HUN007                       | 0.4                  | 0.3                    | 0.3                           | 0.1                      | 0.0                          | 0.1                      | 0.8             | 0.663                | 0.895 |
| uncultured_ <i>Lachnospiraceae</i> _bacterium        | 0.4                  | 0.2                    | 0.3                           | 0.5                      | 0.4                          | 0.6                      | 0.7             | 0.139                | 0.612 |
| Bacterium_AC2043                                     | 0.3                  | 0.4                    | 0.3                           | 0.3                      | 0.2                          | 0.3                      | 0.5             | 0.814                | 0.933 |
| <i>Bacteroidales</i> _BS11_gut_group_unclassified    | 0.3                  | 0.4                    | 0.4                           | 0.1                      | 0.3                          | 0.1                      | 0.3             | 0.595                | 0.864 |
| Uncultured_rumen_bacterium_3C0d_9                    | 0.3                  | 0.1                    | 0.3                           | 0.1                      | 0.1                          | 0.1                      | 0.2             | 0.227                | 0.709 |
| Uncultured_ <i>Prevotellaceae</i> _bacterium         | 0.3                  | 0.1                    | 0.4                           | 0.4                      | 0.3                          | 0.4                      | 0.3             | 0.095                | 0.530 |
| Uncultured_ <i>Clostridium</i> _sp                   | 0.3                  | 0.1                    | 0.1                           | 0.1                      | 0.1                          | 0.2                      | 0.5             | 0.294                | 0.722 |
| <i>Selenomonas ruminantium</i> _AB3002               | 0.2                  | 1.6                    | 1.1                           | 0.2                      | 1.3                          | 0.2                      | 0.2             | 0.278                | 0.722 |
| <i>Butyrivibrio fibrisolvens</i>                     | 0.2                  | 0.3                    | 0.5                           | 0.9                      | 1.7                          | 0.4                      | 0.2             | 0.155                | 0.612 |
| <i>Lachnospiraceae</i> _bacterium_AC2012             | 0.2                  | 0.2                    | 0.1                           | 0.4                      | 0.4                          | 0.1                      | 0.1             | 0.361                | 0.747 |
| <i>Prevotella</i> _sp_CA17                           | 0.2                  | 0.2                    | 0.3                           | 0.3                      | 0.2                          | 0.3                      | 0.1             | 0.943                | 0.943 |
| X_ <i>Eubacterium ventriosum</i> _group_unclassified | 0.2                  | 0.3                    | 0.2                           | 0.0                      | 0.1                          | 0.1                      | 0.1             | 0.772                | 0.929 |
| <i>Lachnospiraceae</i> _unclassified                 | 0.2                  | 0.1                    | 0.1                           | 0.1                      | 0.2                          | 0.2                      | 0.1             | 0.919                | 0.940 |
| <i>Succinivibrio</i> _unclassified                   | 0.2                  | 0.6                    | 0.4                           | 0.3                      | 0.9                          | 0.2                      | 0.1             | 0.404                | 0.747 |
| <i>Lachnospiraceae</i> _bacterium_NK4A144            | 0.2                  | 0.2                    | 0.4                           | 0.3                      | 0.8                          | 0.2                      | 0.1             | 0.159                | 0.612 |
| Unidentified_rumen_bacterium_RC17                    | 0.2                  | 0.2                    | 0.1                           | 0.1                      | 0.1                          | 0.1                      | 0.2             | 0.383                | 0.747 |
| <i>Rikenellaceae</i> _RC9_gut_group_unclassified     | 0.2                  | 0.5                    | 0.2                           | 0.1                      | 0.1                          | 0.1                      | 0.1             | 0.463                | 0.747 |
| <i>Lachnospiraceae</i> _NK3A20_group_unclassified    | 0.2                  | 0.1                    | 0.2                           | 0.2                      | 0.0                          | 0.1                      | 0.1             | 0.196                | 0.653 |
| Bacterium_XPD3003                                    | 0.1                  | 0.1                    | 0.1                           | 0.1                      | 0.0                          | 0.1                      | 0.2             | 0.444                | 0.747 |
| Uncultured_rumen_bacterium_3C0d_20                   | 0.1                  | 0.1                    | 0.0                           | 0.2                      | 0.1                          | 0.2                      | 0.2             | 0.460                | 0.747 |
| Unidentified_rumen_bacterium_RFN89                   | 0.1                  | 0.1                    | 0.0                           | 0.3                      | 0.2                          | 0.2                      | 0.1             | 0.242                | 0.712 |
| <i>Roseburia</i> _unclassified                       | 0.1                  | 0.1                    | 0.1                           | 0.3                      | 0.3                          | 0.2                      | 0.1             | 0.463                | 0.747 |
| <i>Bacteroidales</i> _RF16_group_unclassified        | 0.1                  | 0.2                    | 0.3                           | 0.1                      | 0.1                          | 0.1                      | 0.1             | 0.723                | 0.904 |
| <i>Bacteroidetes</i> _unclassified                   | 0.1                  | 0.1                    | 0.1                           | 0.2                      | 0.2                          | 0.3                      | 0.1             | 0.872                | 0.934 |
| Bacterium_XPB1013                                    | 0.1                  | 0.0                    | 0.2                           | 0.2                      | 0.2                          | 0.1                      | 0.1             | 0.072                | 0.516 |

|                                                   |     |     |     |     |     |     |     |        |       |
|---------------------------------------------------|-----|-----|-----|-----|-----|-----|-----|--------|-------|
| <i>X_Eubacterium_hallii_group_unclassified</i>    | 0.1 | 0.1 | 0.1 | 0.1 | 0.1 | 0.1 | 0.0 | 0.610  | 0.864 |
| <i>Ruminococcus_albus</i>                         | 0.1 | 0.0 | 0.0 | 0.1 | 0.0 | 0.1 | 0.2 | 0.781  | 0.929 |
| <i>Bacterium_XPB4001</i>                          | 0.1 | 0.3 | 0.3 | 0.1 | 0.1 | 0.1 | 0.0 | 0.306  | 0.722 |
| Unidentified_rumen_bacterium_RF31                 | 0.1 | 0.2 | 0.2 | 0.3 | 0.2 | 0.2 | 0.1 | 0.857  | 0.934 |
| Unidentified_rumen_bacterium_RFN13                | 0.1 | 0.0 | 0.0 | 0.2 | 0.2 | 0.2 | 0.1 | 0.497  | 0.755 |
| Bacteria_unclassified                             | 0.0 | 0.0 | 0.8 | 0.1 | 0.1 | 0.1 | 0.0 | <0.001 | 0.001 |
| <i>Clostridiales_vadinBB60_group_unclassified</i> | 0.0 | 0.5 | 0.1 | 0.0 | 0.2 | 0.0 | 0.0 | 0.090  | 0.530 |
| <i>Pantoea_unclassified</i>                       | 0.0 | 0.1 | 1.1 | 0.0 | 3.0 | 0.0 | 0.0 | 0.001  | 0.018 |

<sup>1</sup>Control: Natural grassland hay based on *Dichanthium spp.* harvested in Guadeloupe, French West Indies

<sup>2</sup>Differential abundance was estimated with the metagenomeSeq package (Paulson et al., 2013)

**Supplementary Table 3.** Proportional abundance of bacterial taxa colonising tropical tannin-rich plants incubated in the rumen of cows (n= 3) for 12 h

|                                                            | Control <sup>1</sup> | <i>Acacia nilotica</i> | <i>Calliandra calothyrsus</i> | <i>Gliricidia sepium</i> | <i>Leucaena leucocephala</i> | <i>Manihot esculenta</i> | <i>Musa spp</i> | P value <sup>2</sup> | FRD    |
|------------------------------------------------------------|----------------------|------------------------|-------------------------------|--------------------------|------------------------------|--------------------------|-----------------|----------------------|--------|
| Uncultured_rumen_bacterium                                 | 53.1                 | 52.5                   | 54.2                          | 56.7                     | 47.6                         | 51.3                     | 55.4            | 0.938                | 0.979  |
| <i>Fibrobacter</i> _unclassified                           | 23.7                 | 2.0                    | 4.6                           | 9.9                      | 12.2                         | 9.6                      | 19.9            | 0.030                | 0.142  |
| Uncultured_bacterium                                       | 2.5                  | 6.4                    | 3.8                           | 2.2                      | 3.8                          | 5.8                      | 2.4             | 0.157                | 0.430  |
| Uncultured_rumen_bacterium_unclassified                    | 2.0                  | 1.9                    | 3.3                           | 3.1                      | 2.7                          | 2.2                      | 1.1             | 0.202                | 0.482  |
| <i>Prevotella</i> _1_unclassified                          | 2.0                  | 3.8                    | 4.5                           | 3.2                      | 6.3                          | 3.0                      | 2.9             | 0.545                | 0.799  |
| Uncultured_rumen_bacterium_4C28d_15_unclassified           | 1.4                  | 0.1                    | 0.8                           | 0.2                      | 0.4                          | 0.1                      | 0.2             | <0.001               | <0.001 |
| <i>Prevotella_ruminicola</i>                               | 1.4                  | 0.7                    | 1.0                           | 2.9                      | 1.1                          | 2.3                      | 1.1             | 0.517                | 0.795  |
| Unidentified_rumen_bacterium_RC2                           | 1.3                  | 0.5                    | 1.0                           | 0.3                      | 0.3                          | 0.3                      | 0.5             | 0.131                | 0.394  |
| Uncultured_rumen_bacterium_5C0d_11                         | 1.1                  | 0.1                    | 0.1                           | 0.1                      | 0.2                          | 0.5                      | 2.6             | 0.977                | 0.979  |
| <i>Ruminococcus flavefaciens</i>                           | 1.0                  | 0.1                    | 0.2                           | 0.3                      | 0.3                          | 0.5                      | 1.7             | 0.206                | 0.482  |
| Uncultured_ <i>Prevotellaceae</i> _bacterium               | 0.9                  | 2.9                    | 3.1                           | 2.6                      | 5.2                          | 4.5                      | 2.4             | 0.130                | 0.394  |
| <i>Christensenellaceae</i> _R_7_group_unclassified         | 0.8                  | 1.3                    | 0.7                           | 0.6                      | 0.6                          | 0.6                      | 0.7             | 0.077                | 0.271  |
| <i>Ruminococcus</i> _sp_HUN007                             | 0.8                  | 0.1                    | 0.1                           | 0.0                      | 0.0                          | 0.1                      | 1.8             | 0.961                | 0.979  |
| <i>Butyrivibrio</i> _2_unclassified                        | 0.8                  | 4.8                    | 7.0                           | 4.0                      | 5.9                          | 6.9                      | 1.4             | 0.147                | 0.422  |
| Uncultured_ <i>Lachnospiraceae</i> _bacterium              | 0.6                  | 0.4                    | 0.5                           | 2.5                      | 0.9                          | 0.5                      | 0.7             | 0.757                | 0.924  |
| Uncultured_ <i>Clostridium</i> _sp                         | 0.6                  | 0.1                    | 0.1                           | 0.1                      | 0.0                          | 0.1                      | 0.4             | 0.481                | 0.757  |
| <i>Oribacterium</i> _unclassified                          | 0.5                  | 0.4                    | 0.4                           | 2.0                      | 2.4                          | 0.4                      | 0.3             | 0.778                | 0.924  |
| <i>Treponema</i> _2_unclassified                           | 0.4                  | 1.6                    | 3.2                           | 0.6                      | 1.2                          | 1.4                      | 0.5             | 0.024                | 0.137  |
| Uncultured_rumen_bacterium_3C0d_9                          | 0.3                  | 0.3                    | 0.3                           | 0.1                      | 0.1                          | 0.0                      | 0.2             | 0.979                | 0.979  |
| <i>Prevotella</i> _sp_CA17                                 | 0.3                  | 0.1                    | 0.1                           | 0.2                      | 0.1                          | 0.2                      | 0.2             | 0.269                | 0.527  |
| <i>Streptococcus</i> _unclassified                         | 0.3                  | 1.1                    | 0.0                           | 0.2                      | 0.0                          | 0.0                      | 0.1             | <0.001               | <0.001 |
| <i>Selenomonas ruminantium</i> _AB3002                     | 0.2                  | 0.5                    | 0.1                           | 0.2                      | 0.2                          | 0.0                      | 0.1             | 0.010                | 0.073  |
| bacterium_AC2043                                           | 0.2                  | 0.3                    | 0.2                           | 0.2                      | 0.2                          | 0.1                      | 0.2             | 0.270                | 0.527  |
| <i>Butyrivibrio fibrisolvens</i>                           | 0.2                  | 4.4                    | 1.2                           | 1.5                      | 1.1                          | 0.8                      | 0.2             | 0.005                | 0.042  |
| Bacterium_XPD3003                                          | 0.2                  | 0.1                    | 0.1                           | 0.1                      | 0.1                          | 0.1                      | 0.2             | 0.955                | 0.979  |
| <i>Lachnospiraceae</i> _unclassified                       | 0.2                  | 0.2                    | 0.4                           | 0.3                      | 0.3                          | 0.3                      | 0.1             | 0.071                | 0.263  |
| <i>Lachnospiraceae</i> _bacterium_AC2012                   | 0.2                  | 1.4                    | 0.3                           | 0.8                      | 0.2                          | 0.1                      | 0.2             | <0.001               | 0.004  |
| Uncultured_bacterium_unclassified                          | 0.2                  | 0.0                    | 0.3                           | 0.1                      | 0.1                          | 0.1                      | 0.1             | 0.032                | 0.142  |
| Unidentified_rumen_bacterium_RFN66                         | 0.2                  | 0.1                    | 0.0                           | 0.3                      | 0.2                          | 0.0                      | 0.1             | 0.004                | 0.037  |
| <i>Selenomonas</i> _1_unclassified                         | 0.2                  | 0.7                    | 0.1                           | 0.1                      | 0.2                          | 0.1                      | 0.1             | 0.046                | 0.181  |
| Unidentified_rumen_bacterium_RC11                          | 0.2                  | 0.2                    | 0.2                           | 0.1                      | 0.1                          | 0.1                      | 0.2             | 0.735                | 0.924  |
| <i>X_Eubacterium coprostanoligenes</i> _group_unclassified | 0.2                  | 0.1                    | 0.2                           | 0.1                      | 0.0                          | 0.1                      | 0.1             | 0.848                | 0.953  |
| <i>Ruminococcus albus</i>                                  | 0.1                  | 0.1                    | 0.1                           | 0.0                      | 0.1                          | 0.1                      | 0.3             | 0.694                | 0.911  |
| Unidentified_rumen_bacterium_RFN89                         | 0.1                  | 0.1                    | 0.1                           | 0.2                      | 0.1                          | 0.0                      | 0.0             | 0.617                | 0.845  |
| Unidentified_rumen_bacterium_RFN13                         | 0.1                  | 0.1                    | 0.1                           | 0.1                      | 0.2                          | 0.2                      | 0.0             | 0.042                | 0.176  |
| <i>X_Eubacterium hallii</i> _group_unclassified            | 0.1                  | 0.2                    | 0.1                           | 0.1                      | 0.1                          | 0.0                      | 0.1             | 0.085                | 0.282  |
| <i>Bacteroidales</i> _BS11_gut_group_unclassified          | 0.1                  | 0.1                    | 0.1                           | 0.0                      | 0.0                          | 0.0                      | 0.1             | 0.820                | 0.939  |
| Human_gut_metagenome                                       | 0.1                  | 0.1                    | 0.2                           | 0.0                      | 0.1                          | 0.1                      | 0.1             | 0.643                | 0.861  |
| Uncultured_prokaryote                                      | 0.1                  | 0.0                    | 0.0                           | 0.0                      | 0.0                          | 0.0                      | 0.0             | 0.440                | 0.710  |
| <i>Succinivibrio</i> _unclassified                         | 0.1                  | 0.8                    | 0.1                           | 0.1                      | 0.1                          | 0.1                      | 0.0             | 0.000                | 0.001  |
| <i>Roseburia</i> _unclassified                             | 0.1                  | 0.8                    | 0.2                           | 1.1                      | 0.4                          | 0.5                      | 0.1             | 0.002                | 0.019  |



|                                                    |     |     |     |     |     |     |     |       |       |
|----------------------------------------------------|-----|-----|-----|-----|-----|-----|-----|-------|-------|
| <i>Bacterium_XPB1013</i>                           | 0.1 | 0.3 | 0.4 | 0.2 | 0.8 | 0.5 | 0.3 | 0.293 | 0.527 |
| <i>Lachnospiraceae_bacterium_NK4A144</i>           | 0.1 | 0.7 | 0.3 | 0.3 | 0.5 | 0.1 | 0.1 | 0.023 | 0.137 |
| <i>Ruminococcus_1_unclassified</i>                 | 0.1 | 0.0 | 0.0 | 0.0 | 0.1 | 0.1 | 0.0 | 0.164 | 0.430 |
| <i>Bacteroidales_S24_7_group_unclassified</i>      | 0.1 | 0.2 | 0.4 | 0.3 | 0.3 | 0.2 | 0.0 | 0.792 | 0.924 |
| Uncultured_rumen_bacterium_3C0d_20                 | 0.1 | 0.1 | 0.1 | 0.1 | 0.1 | 0.1 | 0.1 | 0.615 | 0.845 |
| Unidentified_rumen_bacterium_RF31                  | 0.1 | 0.5 | 0.2 | 0.4 | 0.2 | 0.2 | 0.1 | 0.002 | 0.019 |
| <i>X_Eubacterium_ventriosum_group_unclassified</i> | 0.1 | 0.1 | 0.1 | 0.0 | 0.0 | 0.1 | 0.1 | 0.900 | 0.979 |
| <i>Lachnospiraceae_NK3A20_group_unclassified</i>   | 0.1 | 0.1 | 0.2 | 0.1 | 0.0 | 0.1 | 0.1 | 0.349 | 0.611 |
| <i>X_Clostridium_aminophilum</i>                   | 0.1 | 0.0 | 0.0 | 0.1 | 0.2 | 0.1 | 0.0 | 0.272 | 0.527 |
| <i>Bacteroidetes_unclassified</i>                  | 0.1 | 0.2 | 0.4 | 0.1 | 0.7 | 0.7 | 0.1 | 0.176 | 0.444 |
| <i>Mollicutes_unclassified</i>                     | 0.1 | 1.8 | 2.4 | 0.2 | 0.3 | 1.4 | 0.0 | 0.289 | 0.527 |
| <i>Saccharofermentans_unclassified</i>             | 0.0 | 0.0 | 0.1 | 0.0 | 0.0 | 0.0 | 0.1 | 0.361 | 0.615 |
| <i>Anaeroplasma_unclassified</i>                   | 0.0 | 1.5 | 1.7 | 0.3 | 0.2 | 1.4 | 0.0 | 0.279 | 0.527 |
| <i>Bacteroidales_unclassified</i>                  | 0.0 | 0.0 | 0.0 | 0.0 | 0.1 | 0.1 | 0.1 | 0.289 | 0.527 |
| Unidentified_rumen_bacterium_RC17                  | 0.0 | 0.1 | 0.1 | 0.1 | 0.1 | 0.1 | 0.2 | 0.951 | 0.979 |
| <i>X_Eubacterium_rectale_group_unclassified</i>    | 0.0 | 0.0 | 0.1 | 0.1 | 0.0 | 0.2 | 0.1 | 0.760 | 0.924 |
| <i>Treponema_sp_S</i>                              | 0.0 | 0.2 | 0.2 | 0.1 | 0.2 | 0.6 | 0.1 | 0.541 | 0.799 |
| Unidentified                                       | 0.0 | 3.0 | 0.3 | 0.1 | 0.7 | 0.3 | 0.0 | 0.249 | 0.527 |
| <i>X_Eubacterium_cellulosolvens_6</i>              | 0.0 | 0.0 | 0.0 | 0.0 | 0.0 | 0.1 | 0.2 | 0.605 | 0.845 |
| Bacterium_ND2006                                   | 0.0 | 0.2 | 0.1 | 0.1 | 0.2 | 0.0 | 0.0 | 0.026 | 0.138 |
| <i>Porphyromonadaceae_unclassified</i>             | 0.0 | 0.0 | 0.0 | 0.0 | 0.0 | 0.1 | 0.0 | 0.429 | 0.710 |
| <i>Prevotella_bryantii_B14</i>                     | 0.0 | 0.1 | 0.1 | 0.3 | 0.1 | 0.3 | 0.0 | 0.779 | 0.924 |

<sup>1</sup>Control: Natural grassland hay based on *Dichanthium spp.* harvested in Guadeloupe, French West Indies

<sup>2</sup>Differential abundance was estimated with the metagenomeSeq package (Paulson et al., 2013)

**Supplementary Table 4.** Proportional abundance of bacterial families colonising tropical tannin-rich plants incubated in the rumen of cows (n= 3) for 3 h

|                                      | Control <sup>1</sup> | <i>Acacia nilotica</i> | <i>Calliandra calothyrsus</i> | <i>Gliricidia sepium</i> | <i>Leucaena leucocephala</i> | <i>Manihot esculenta</i> | <i>Musa spp</i> | P value <sup>2</sup> | FRD   |
|--------------------------------------|----------------------|------------------------|-------------------------------|--------------------------|------------------------------|--------------------------|-----------------|----------------------|-------|
| <i>Prevotellaceae</i>                | 28.9                 | 24.2                   | 30.6                          | 26.2                     | 23.0                         | 37.7                     | 27.5            | 0.042                | 0.147 |
| <i>Lachnospiraceae</i>               | 15.6                 | 12.0                   | 21.2                          | 30.2                     | 41.8                         | 16.9                     | 14.0            | 0.010                | 0.045 |
| <i>Christensenellaceae</i>           | 15.3                 | 15.9                   | 10.9                          | 14.1                     | 7.5                          | 15.6                     | 20.2            | 0.635                | 0.846 |
| <i>Fibrobacteraceae</i>              | 11.5                 | 2.1                    | 3.9                           | 5.2                      | 3.5                          | 8.1                      | 12.9            | 0.005                | 0.030 |
| <i>Ruminococcaceae</i>               | 7.3                  | 8.0                    | 6.0                           | 5.2                      | 3.8                          | 5.9                      | 9.4             | 0.911                | 0.966 |
| <i>Streptococcaceae</i>              | 4.1                  | 0.2                    | 0.1                           | 0.8                      | 0.3                          | 0.1                      | 0.5             | 0.916                | 0.966 |
| <i>Rikenellaceae</i>                 | 4.0                  | 4.9                    | 4.7                           | 2.2                      | 2.5                          | 2.0                      | 2.3             | 0.626                | 0.846 |
| <i>Acidaminococcaceae</i>            | 3.5                  | 1.5                    | 2.5                           | 6.4                      | 2.3                          | 3.7                      | 5.3             | 0.042                | 0.147 |
| <i>Bacteroidales_BS11_gut_group</i>  | 1.7                  | 3.1                    | 2.1                           | 1.4                      | 1.5                          | 1.0                      | 1.4             | 0.762                | 0.927 |
| <i>Spirochaetaceae</i>               | 1.6                  | 1.8                    | 3.3                           | 1.5                      | 2.4                          | 3.4                      | 1.6             | 0.017                | 0.069 |
| <i>Coriobacteriaceae</i>             | 1.5                  | 6.5                    | 2.5                           | 1.7                      | 1.2                          | 0.9                      | 1.8             | 0.165                | 0.421 |
| <i>Bacteroidales_RF16_group</i>      | 1.3                  | 4.5                    | 4.4                           | 2.0                      | 1.7                          | 1.1                      | 1.0             | 0.444                | 0.654 |
| <i>Veillonellaceae</i>               | 0.7                  | 2.3                    | 2.1                           | 0.7                      | 3.7                          | 0.4                      | 0.4             | 0.309                | 0.633 |
| <i>Bacteroidales_S24_7_group</i>     | 0.6                  | 0.5                    | 0.4                           | 0.4                      | 0.3                          | 0.5                      | 0.3             | 0.369                | 0.633 |
| <i>Clostridiales_vadinBB60_group</i> | 0.5                  | 0.2                    | 0.1                           | 0.0                      | 0.1                          | 0.1                      | 0.1             | 0.074                | 0.207 |
| Family_XIII                          | 0.4                  | 0.5                    | 0.5                           | 0.4                      | 0.3                          | 0.2                      | 0.2             | 0.758                | 0.927 |
| <i>Rhodospirillaceae</i>             | 0.3                  | 0.8                    | 2.3                           | 0.4                      | 0.3                          | 0.2                      | 0.2             | 0.004                | 0.030 |
| <i>Anaeroplasmataceae</i>            | 0.3                  | 0.6                    | 0.6                           | 0.3                      | 0.3                          | 0.5                      | 0.2             | 0.407                | 0.633 |
| <i>Anaerolineaceae</i>               | 0.2                  | 0.1                    | 0.1                           | 0.2                      | 0.1                          | 0.2                      | 0.2             | 0.917                | 0.966 |
| <i>Bacteroidales_UCG_001</i>         | 0.2                  | 0.9                    | 0.3                           | 0.1                      | 0.3                          | 0.1                      | 0.2             | 0.287                | 0.633 |
| <i>Succinivibrionaceae</i>           | 0.2                  | 0.6                    | 0.4                           | 0.3                      | 0.9                          | 0.2                      | 0.1             | 0.392                | 0.633 |
| <i>Erysipelotrichaceae</i>           | 0.1                  | 0.3                    | 0.2                           | 0.0                      | 0.1                          | 0.0                      | 0.1             | 0.370                | 0.633 |
| <i>Bacteroidetes_unclassified</i>    | 0.1                  | 0.1                    | 0.2                           | 0.2                      | 0.2                          | 0.3                      | 0.1             | 0.966                | 0.966 |
| <i>Bacteroidales_unclassified</i>    | 0.0                  | 0.0                    | 0.0                           | 0.0                      | 0.1                          | 0.0                      | 0.1             | 0.916                | 0.966 |
| <i>Mollicutes_unclassified</i>       | 0.0                  | 0.1                    | 0.0                           | 0.0                      | 0.0                          | 0.0                      | 0.0             | 0.392                | 0.633 |

<sup>1</sup>Control: Natural grassland hay based on *Dichanthium spp.* harvested in Guadeloupe, French West Indies

<sup>2</sup>Differential abundance was estimated with the metagenomeSeq package (Paulson et al., 2013)

**Supplementary Table 5.** Proportional abundance of bacterial families colonising tropical tannin-rich plants incubated in the rumen of cows (n= 3) for 12 h

|                                      | Control <sup>1</sup> | <i>Acacia nilotica</i> | <i>Calliandra calothyrsus</i> | <i>Gliricidia sepium</i> | <i>Leucaena leucocephala</i> | <i>Manihot esculenta</i> | <i>Musa spp</i> | P value <sup>2</sup> | FRD    |
|--------------------------------------|----------------------|------------------------|-------------------------------|--------------------------|------------------------------|--------------------------|-----------------|----------------------|--------|
| <i>Fibrobacteraceae</i>              | 26.9                 | 2.7                    | 5.9                           | 11.1                     | 13.9                         | 11.0                     | 23.1            | 0.022                | 0.099  |
| <i>Prevotellaceae</i>                | 20.8                 | 24.5                   | 21.5                          | 21.8                     | 28.0                         | 27.8                     | 24.7            | 0.571                | 0.727  |
| <i>Christensenellaceae</i>           | 12.7                 | 9.9                    | 7.3                           | 7.7                      | 7.3                          | 6.3                      | 12.9            | 0.112                | 0.253  |
| <i>Lachnospiraceae</i>               | 12.5                 | 39.6                   | 30.7                          | 39.9                     | 29.8                         | 22.3                     | 14.5            | 0.309                | 0.504  |
| <i>Ruminococcaceae</i>               | 8.2                  | 2.7                    | 4.9                           | 3.3                      | 3.1                          | 4.6                      | 9.7             | 0.004                | 0.021  |
| <i>Rikenellaceae</i>                 | 7.7                  | 2.4                    | 7.0                           | 2.5                      | 2.7                          | 2.8                      | 2.6             | 0.002                | 0.015  |
| <i>Acidaminococcaceae</i>            | 2.4                  | 0.9                    | 1.1                           | 3.2                      | 2.1                          | 1.5                      | 2.5             | 0.670                | 0.787  |
| <i>Spirochaetaceae</i>               | 1.9                  | 5.1                    | 7.0                           | 3.2                      | 5.3                          | 13.9                     | 7.2             | 0.940                | 0.976  |
| <i>Clostridiales_vadinBB60_group</i> | 1.4                  | 0.1                    | 0.9                           | 0.2                      | 0.4                          | 0.1                      | 0.2             | <0.001               | <0.001 |
| <i>Bacteroidales_S24_7_group</i>     | 1.2                  | 1.7                    | 3.1                           | 2.2                      | 2.5                          | 2.0                      | 0.6             | 0.044                | 0.133  |
| <i>Anaeroplasmataceae</i>            | 0.7                  | 3.2                    | 4.8                           | 2.0                      | 1.9                          | 4.2                      | 0.2             | 0.069                | 0.169  |
| <i>Coriobacteriaceae</i>             | 0.6                  | 0.3                    | 0.4                           | 0.4                      | 0.1                          | 0.2                      | 0.3             | 0.420                | 0.629  |
| <i>Bacteroidales_BS11_gut_group</i>  | 0.6                  | 0.3                    | 0.7                           | 0.5                      | 0.2                          | 0.3                      | 0.3             | 0.027                | 0.102  |
| <i>Veillonellaceae</i>               | 0.5                  | 1.3                    | 0.3                           | 0.3                      | 0.5                          | 0.2                      | 0.2             | 0.030                | 0.102  |
| Family_XIII                          | 0.4                  | 0.2                    | 0.3                           | 0.3                      | 0.1                          | 0.1                      | 0.2             | 0.708                | 0.796  |
| <i>Bacteroidales_RF16_group</i>      | 0.3                  | 0.3                    | 0.4                           | 0.6                      | 0.5                          | 0.2                      | 0.2             | 0.521                | 0.727  |
| <i>Streptococcaceae</i>              | 0.3                  | 1.2                    | 0.0                           | 0.2                      | 0.0                          | 0.0                      | 0.1             | 0.000                | 0.000  |
| <i>Bacteroidales_UCG_001</i>         | 0.2                  | 0.1                    | 0.1                           | 0.0                      | 0.0                          | 0.0                      | 0.2             | 0.989                | 0.989  |
| <i>Rhodospirillaceae</i>             | 0.2                  | 0.1                    | 0.3                           | 0.1                      | 0.1                          | 0.1                      | 0.1             | 0.317                | 0.504  |
| <i>Anaerolineaceae</i>               | 0.2                  | 0.0                    | 0.2                           | 0.1                      | 0.1                          | 0.1                      | 0.1             | 0.845                | 0.912  |
| <i>Succinivibrionaceae</i>           | 0.1                  | 0.8                    | 0.1                           | 0.1                      | 0.1                          | 0.1                      | 0.0             | <0.001               | <0.001 |
| <i>Bacteroidetes_unclassified</i>    | 0.1                  | 0.2                    | 0.4                           | 0.1                      | 0.7                          | 0.7                      | 0.1             | 0.153                | 0.317  |
| <i>Erysipelotrichaceae</i>           | 0.1                  | 0.0                    | 0.1                           | 0.0                      | 0.0                          | 0.0                      | 0.0             | 0.547                | 0.727  |
| <i>Mollicutes_unclassified</i>       | 0.1                  | 2.0                    | 2.5                           | 0.2                      | 0.3                          | 1.4                      | 0.0             | 0.592                | 0.727  |
| <i>Bacteroidales_unclassified</i>    | 0.0                  | 0.0                    | 0.0                           | 0.0                      | 0.1                          | 0.1                      | 0.1             | 0.237                | 0.456  |

<sup>1</sup>Control hay: Natural grassland hay based on *Dichanthium spp.* harvested in Guadeloupe, French West Indies

<sup>2</sup>Differential abundance was estimated with the metagenomeSeq package (Paulson et al., 2013)

**Supplementary Table 6.** Proportional abundance of archaea colonising tropical tannin-rich plants incubated in the rumen of cows (n= 3) for 3 h

|                                               | Control <sup>1</sup> | <i>Acacia nilotica</i> | <i>Calliandra calothyrsus</i> | <i>Gliricidia sepium</i> | <i>Leucaena leucocephala</i> | <i>Manihot esculenta</i> | <i>Musa spp</i> | P value <sup>2</sup> | FRD   |
|-----------------------------------------------|----------------------|------------------------|-------------------------------|--------------------------|------------------------------|--------------------------|-----------------|----------------------|-------|
| <i>Methanobrevibacter_gottschalkii</i> _clade | 61.4                 | 65.1                   | 63.0                          | 65.3                     | 66.6                         | 65.5                     | 69.6            | 0.929                | 0.929 |
| Not_Assigned                                  | 17.5                 | 14.3                   | 13.9                          | 17.9                     | 15.1                         | 12.9                     | 11.2            | 0.772                | 0.836 |
| Group9_sp                                     | 9.2                  | 8.7                    | 10.8                          | 8.8                      | 5.3                          | 7.7                      | 8.6             | 0.406                | 0.627 |
| <i>Methanobrevibacter_ruminantium</i> _clade  | 6.2                  | 4.6                    | 6.0                           | 4.1                      | 4.8                          | 5.3                      | 5.9             | 0.434                | 0.627 |
| Group10_sp                                    | 2.8                  | 1.4                    | 2.7                           | 1.4                      | 7.1                          | 5.5                      | 1.9             | 0.054                | 0.213 |
| <i>Methanosphaera_sp</i> _ISO3_F5             | 2.0                  | 4.1                    | 1.9                           | 1.4                      | 1.0                          | 1.8                      | 1.6             | 0.065                | 0.213 |
| <i>Methanosphaera_stadtmanae</i>              | 0.3                  | 0.3                    | 0.4                           | 0.2                      | 0.0                          | 0.2                      | 0.7             | 0.554                | 0.655 |
| <i>Methanobrevibacter_oralis</i>              | 0.2                  | 0.4                    | 0.3                           | 0.1                      | 0.1                          | 0.2                      | 0.2             | 0.334                | 0.621 |
| <i>Methanosphaera_cuniculi</i>                | 0.2                  | 0.4                    | 0.1                           | 0.1                      | 0.0                          | 0.1                      | 0.2             | 0.008                | 0.098 |
| <i>Methanobrevibacter_smithii</i>             | 0.1                  | 0.0                    | 0.1                           | 0.1                      | 0.0                          | 0.1                      | 0.1             | 0.331                | 0.621 |
| <i>Methanomicrobium_mobile</i>                | 0.1                  | 0.5                    | 0.7                           | 0.3                      | 0.0                          | 0.1                      | 0.0             | 0.232                | 0.604 |
| <i>Methanobacterium_alkaliphilum</i>          | 0.1                  | 0.0                    | 0.0                           | 0.0                      | 0.0                          | 0.1                      | 0.0             | 0.038                | 0.213 |

<sup>1</sup>Control: Natural grassland hay based on *Dichanthium spp.* harvested in Guadeloupe, French West Indies

<sup>2</sup>Differential abundance was estimated with the metagenomeSeq package (Paulson et al., 2013)

**Supplementary Table 7.** Proportional abundance of archaea colonising tropical tannin-rich plants incubated in the rumen of cows (n= 3) for 12 h

|                                               | Control <sup>1</sup> | <i>Acacia nilotica</i> | <i>Calliandra calothyrsus</i> | <i>Gliricidia sepium</i> | <i>Leucaena leucocephala</i> | <i>Manihot esculenta</i> | <i>Musa spp</i> | P value <sup>2</sup> | FRD   |
|-----------------------------------------------|----------------------|------------------------|-------------------------------|--------------------------|------------------------------|--------------------------|-----------------|----------------------|-------|
| <i>Methanobrevibacter_gottschalkii</i> _clade | 40.8                 | 53.8                   | 40.8                          | 53.9                     | 50.4                         | 52.6                     | 58.0            | 0.673                | 0.828 |
| Not_Assigned                                  | 24.0                 | 17.5                   | 21.9                          | 15.8                     | 16.8                         | 13.3                     | 16.6            | 0.776                | 0.887 |
| Group9_sp                                     | 11.5                 | 7.2                    | 11.5                          | 10.1                     | 11.6                         | 12.9                     | 9.9             | 0.246                | 0.636 |
| <i>Methanobrevibacter_ruminantium</i> _clade  | 11.3                 | 9.8                    | 11.8                          | 8.2                      | 9.4                          | 8.6                      | 8.0             | 0.585                | 0.813 |
| Group10_sp                                    | 9.1                  | 6.0                    | 9.4                           | 9.1                      | 8.8                          | 9.3                      | 4.7             | 0.077                | 0.636 |
| <i>Methanosphaera_sp_ISO3_F5</i>              | 1.3                  | 3.6                    | 2.2                           | 2.1                      | 1.4                          | 2.1                      | 1.5             | 0.429                | 0.765 |
| Group11_sp                                    | 0.7                  | 0.2                    | 0.5                           | 0.1                      | 0.3                          | 0.6                      | 0.0             | 0.928                | 0.928 |
| <i>Methanosphaera_stadtmanae</i>              | 0.5                  | 0.7                    | 1.0                           | 0.2                      | 0.8                          | 0.1                      | 0.3             | 0.461                | 0.765 |
| <i>Methanobrevibacter_oralis</i>              | 0.3                  | 0.4                    | 0.5                           | 0.3                      | 0.2                          | 0.3                      | 0.3             | 0.478                | 0.765 |
| <i>Methanomicrobium_mobile</i>                | 0.2                  | 0.5                    | 0.2                           | 0.1                      | 0.0                          | 0.0                      | 0.3             | 0.874                | 0.928 |
| <i>Methanobrevibacter_smithii</i>             | 0.1                  | 0.1                    | 0.1                           | 0.1                      | 0.1                          | 0.1                      | 0.1             | 0.190                | 0.636 |
| Group8_sp                                     | 0.1                  | 0.0                    | 0.0                           | 0.0                      | 0.0                          | 0.0                      | 0.0             | 0.166                | 0.636 |
| <i>Methanosphaera_cuniculi</i>                | 0.1                  | 0.2                    | 0.1                           | 0.0                      | 0.0                          | 0.1                      | 0.1             | 0.115                | 0.636 |
| <i>Methanobacterium_alkaliphilum</i>          | 0.0                  | 0.0                    | 0.0                           | 0.0                      | 0.0                          | 0.0                      | 0.0             | 0.610                | 0.813 |

<sup>1</sup>Control: Natural grassland hay based on *Dichanthium spp.* harvested in Guadeloupe, French West Indies

<sup>2</sup>Differential abundance was estimated with the metagenomeSeq package (Paulson et al., 2013)

**Supplementary Table 8.** Proportional abundance of protozoa associated to tropical tannin-rich plants incubated in the rumen of cows (n= 3) for 3 h

|                                             | Control <sup>1</sup> | <i>Acacia nilotica</i> | <i>Calliandra calothyrsus</i> | <i>Gliricidia sepium</i> | <i>Leucaena leucocephala</i> | <i>Manihot esculenta</i> | <i>Musa spp</i> | P value | FRD    |
|---------------------------------------------|----------------------|------------------------|-------------------------------|--------------------------|------------------------------|--------------------------|-----------------|---------|--------|
| Uncultured_rumen_protozoa_unclassified      | 63.8                 | 28.7                   | 51.2                          | 51.9                     | 60.2                         | 79.8                     | 79.6            | 0.029   | 0.113  |
| <i>Isotricha prostoma</i> _unclassified     | 20.8                 | 63.1                   | 30.2                          | 32.6                     | 18.3                         | 7.5                      | 13.6            | <0.001  | 0.001  |
| <i>Diplodinium</i> _unclassified            | 3.1                  | 0.2                    | 1.1                           | 1.5                      | 3.0                          | 2.7                      | 0.3             | 0.388   | 0.657  |
| <i>Trichostomatia</i> _unclassified         | 3.1                  | 0.7                    | 2.9                           | 2.1                      | 2.7                          | 2.4                      | 0.8             | 0.802   | 0.935  |
| Uncultured_protist_unclassified             | 2.4                  | 0.5                    | 1.6                           | 1.2                      | 1.2                          | 1.9                      | 2.8             | 0.813   | 0.935  |
| <i>Eudiplodinium maggii</i> _unclassified   | 2.4                  | 1.0                    | 4.0                           | 3.2                      | 6.0                          | 1.9                      | 0.2             | 0.870   | 0.953  |
| <i>Ophryoscolex</i> _unclassified           | 1.5                  | 0.2                    | 1.2                           | 1.4                      | 1.7                          | 1.4                      | 0.3             | 0.376   | 0.657  |
| <i>Isotricha intestinalis</i> _unclassified | 1.3                  | 3.3                    | 1.0                           | 1.1                      | 1.3                          | 1.0                      | 2.0             | <0.001  | <0.001 |
| <i>Dasytricha ruminantium</i> _unclassified | 0.9                  | 0.5                    | 1.2                           | 1.5                      | 0.2                          | 0.6                      | 0.3             | 0.206   | 0.475  |
| <i>Isotricha</i> _unclassified              | 0.7                  | 2.0                    | 5.6                           | 3.3                      | 5.5                          | 0.7                      | 0.2             | 0.095   | 0.273  |

<sup>1</sup>Control: Natural grassland hay based on *Dichanthium spp.* harvested in Guadeloupe, French West Indies

<sup>2</sup>Differential abundance was estimated with the metagenomeSeq package (Paulson et al., 2013)

**Supplementary Table 9.** Proportional abundance of protozoa associated to tropical tannin-rich plants incubated in the rumen of cows (n= 3) for 12 h

|                                             | Control <sup>1</sup> | <i>Acacia nilotica</i> | <i>Calliandra calothyrsus</i> | <i>Gliricidia sepium</i> | <i>Leucaena leucocephala</i> | <i>Manihot esculenta</i> | <i>Musa spp</i> | P value | FRD   |
|---------------------------------------------|----------------------|------------------------|-------------------------------|--------------------------|------------------------------|--------------------------|-----------------|---------|-------|
| Uncultured_rumen_protozoa_unclassified      | 62.9                 | 53.4                   | 36.2                          | 36.2                     | 55.8                         | 65.7                     | 66.6            | 0.005   | 0.046 |
| <i>Eudiplodinium maggii</i> _unclassified   | 17.2                 | 10.9                   | 14.6                          | 14.6                     | 16.9                         | 8.2                      | 3.8             | 0.787   | 0.871 |
| <i>Isotricha prostoma</i> _unclassified     | 10.6                 | 29.3                   | 33.1                          | 33.1                     | 19.3                         | 10.2                     | 21.9            | 0.046   | 0.208 |
| <i>Diplodinium</i> _unclassified            | 3.3                  | 0.3                    | 1.2                           | 1.2                      | 0.4                          | 4.2                      | 0.4             | 0.663   | 0.871 |
| <i>Trichostomatia</i> _unclassified         | 3.0                  | 1.3                    | 2.4                           | 2.4                      | 2.2                          | 4.4                      | 1.0             | 0.401   | 0.871 |
| <i>Isotricha intestinalis</i> _unclassified | 1.1                  | 2.2                    | 3.5                           | 3.5                      | 1.0                          | 1.2                      | 2.5             | 0.588   | 0.871 |
| Uncultured_protist_unclassified             | 0.8                  | 0.8                    | 1.2                           | 1.2                      | 0.0                          | 3.3                      | 3.5             | 0.848   | 0.871 |
| <i>Ophryoscolex</i> _unclassified           | 0.6                  | 0.2                    | 0.2                           | 0.2                      | 0.2                          | 0.9                      | 0.1             | 0.871   | 0.871 |
| <i>Isotricha</i> _unclassified              | 0.5                  | 1.5                    | 7.3                           | 7.3                      | 3.7                          | 1.3                      | 0.3             | 0.273   | 0.819 |

<sup>1</sup>Control: Natural grassland hay based on *Dichanthium spp.* harvested in Guadeloupe, French West Indies

<sup>2</sup>Differential abundance was estimated with the metagenomeSeq package (Paulson et al., 2013)

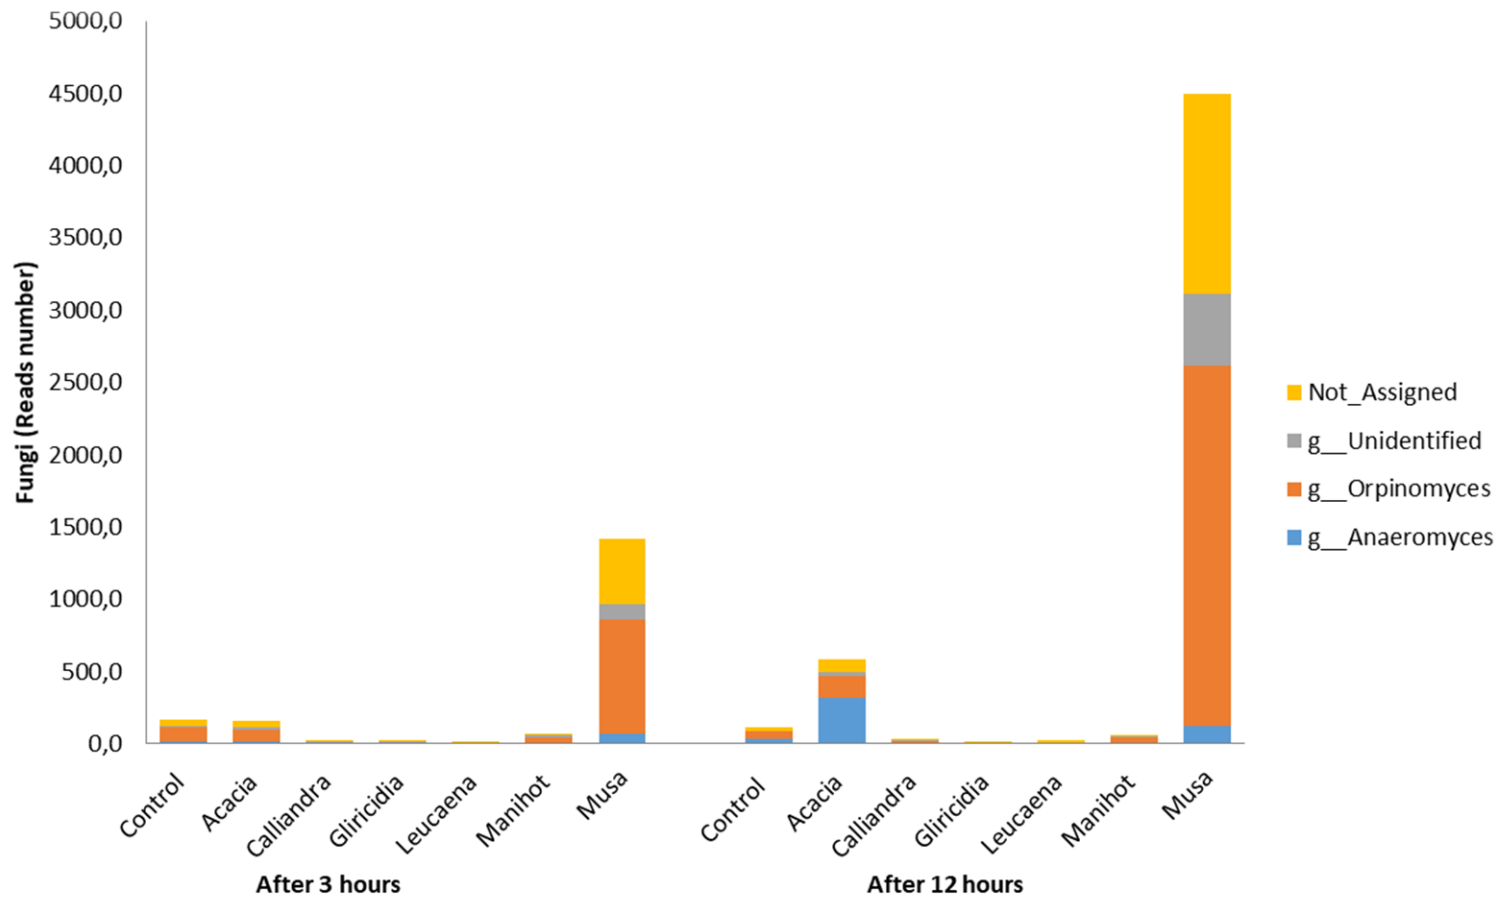

**Supplementary Fig. 1.** Abundance of anaerobic fungal taxa (ITS amplicon) colonising tropical tannin-rich plants incubated in the rumen of cows (n= 3) for 3 and 12 h

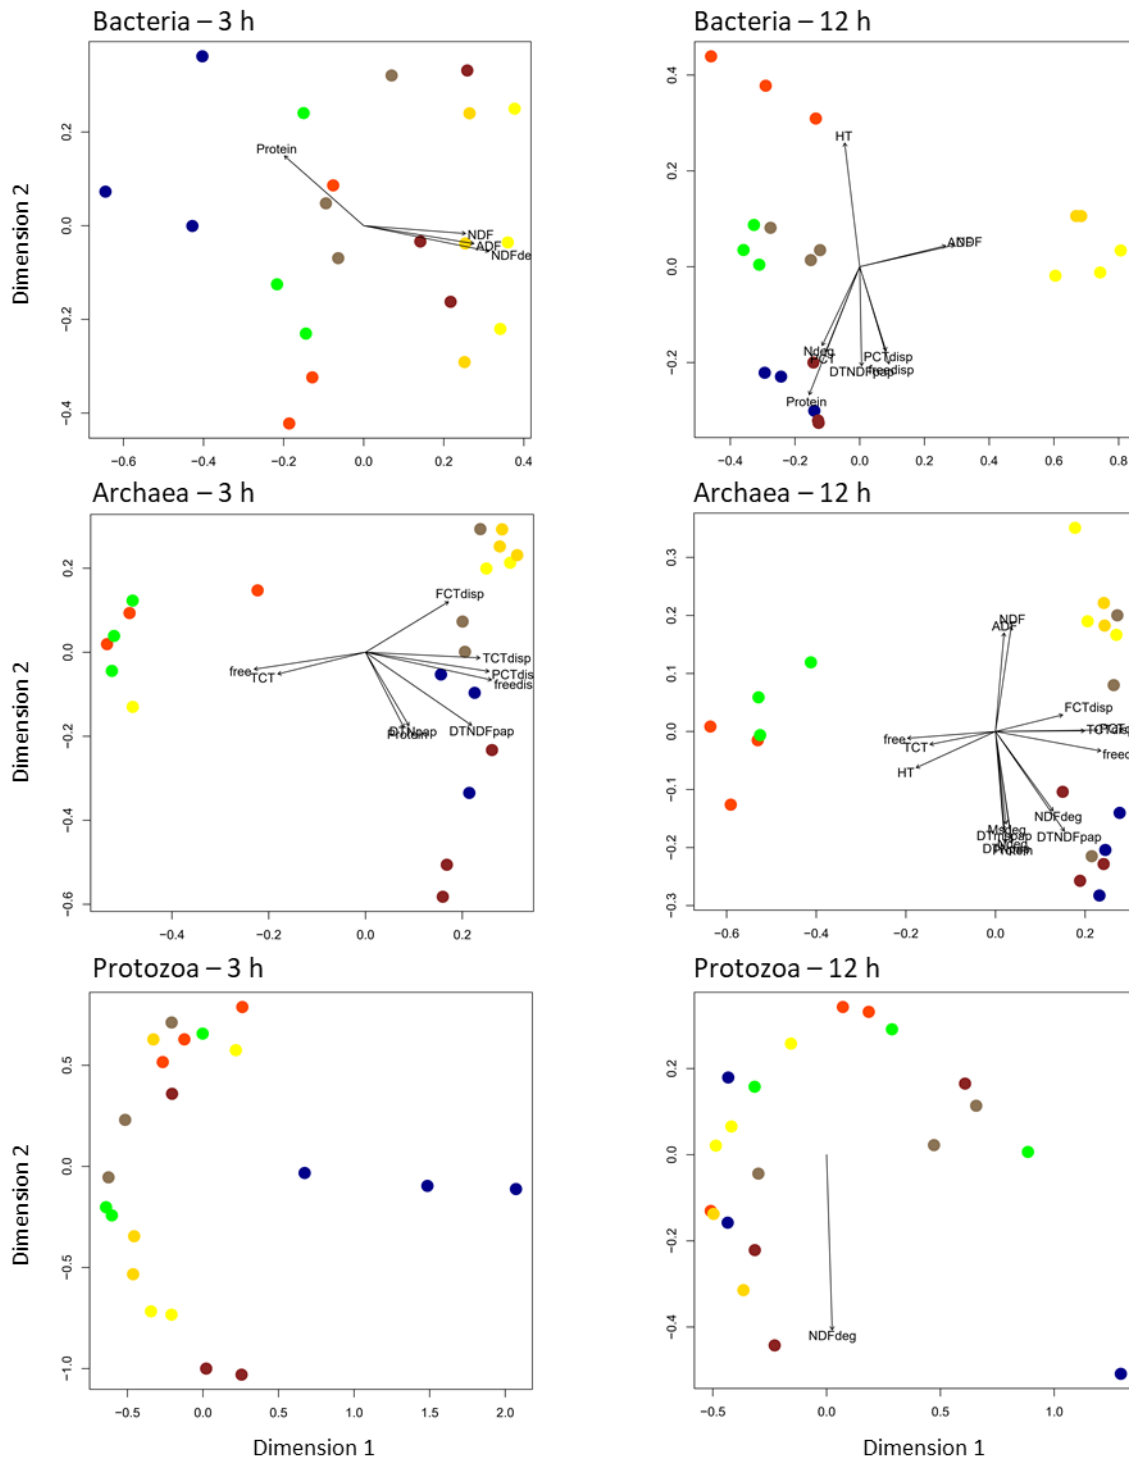

Supplementary Figure 2. Relationship between chemical composition and degradability in the rumen of tropical tannin-rich plants and their associated microbial communities after 3 and 12 h of incubation.

● = control; ● = *Acacia nilotica*; ● = *Calliandra calothyrsus*; ● = *Gliricidia sepium*; ● = *Leucaena leucocephala*; ● = *Manihot esculenta*; ● = *Musa spp.* Variables included in the analysis were NDF, ADF and N content; DM, NDF and N degradability after 3 or 12 h of incubation; DM, N and NDF theoretical degradability; contents in hydrolysable and total condensed tannins and their fractions; disappearance of total condensed tannins and their fractions. Variables significantly correlated are depicted in the graphs.



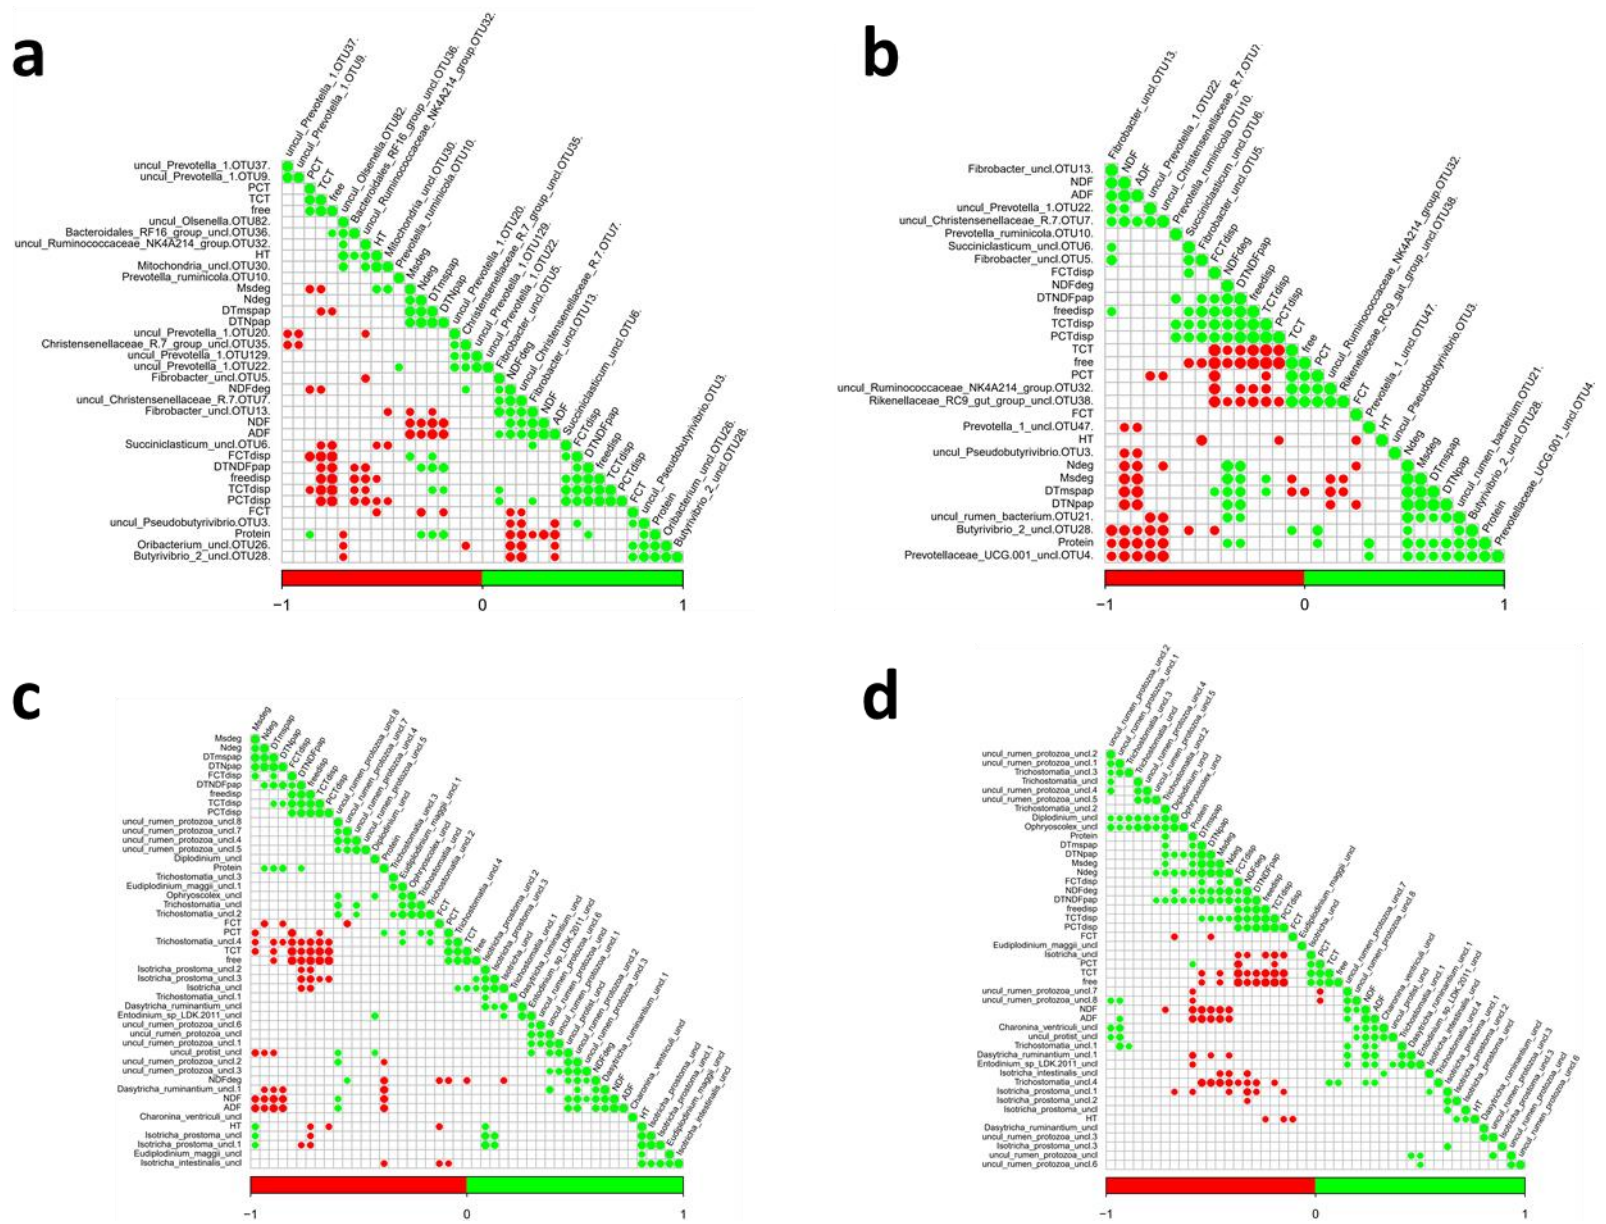

**Supplementary Figure 3.** Correlations between microbial species and characteristics of tropical tannin-rich plants after 3 and 12 h of incubation of feeds in the rumen. A: bacteria at 3 h of incubation; B: bacteria, 12 h of incubation; C: protozoa, 3 h of incubation; D: protozoa, 12 h of incubation. For bacteria, operational taxonomic units with abundance > 1% are shown. Green and red dots indicate positive and negative significant correlations ( $P < 0.05$ ), respectively.

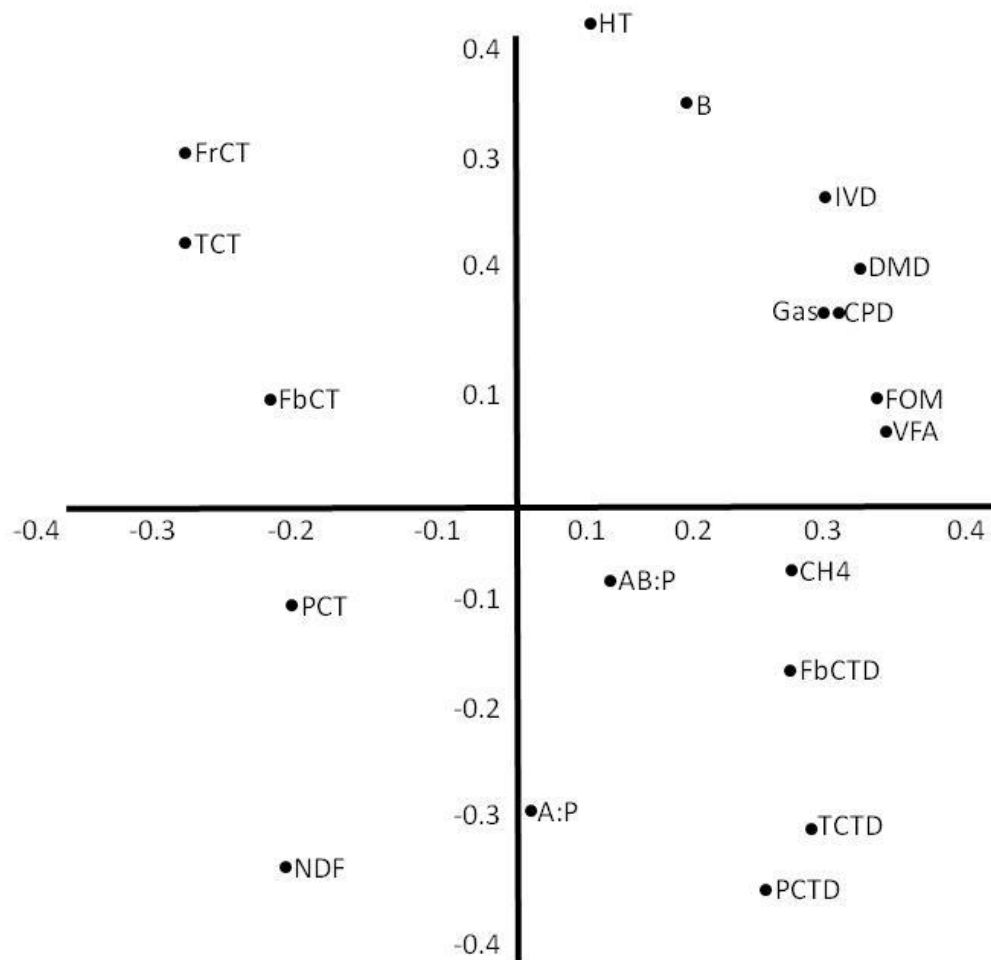

**Supplementary Fig. 4.** Contribution of variables of tropical tannin-rich plants and variables obtained in vitro and in situ.

Abscissa and intercept represent the two main components accounting for 49 and 21% of total variability, respectively. Values in the axes are eigenvalues of the correlation matrix. Observations are average values for each tannin-rich plant (n = 6).

Variables of feed characterisation: NDF: neutral detergent fiber; FbCT: fibre-bound condensed tannins; FrCT: free condensed tannins; PCT: protein-bound condensed tannins; TCT: total condensed tannins; HT: hydrolysable tannins; IVD: *in vitro* digestibility. Variables from Exp. 1: DMD: dry matter degradability; CPD: crude protein degradability; FbCTD: fibre-bound condensed tannins disappearance; PCTD: protein-bound condensed tannins disappearance; TCTD: total condensed tannins disappearance. Variables from Exp. 2: VFA: total volatile fatty acid production; A:P: acetate:propionate ratio; AB:P: (acetate + butyrate):propionate ratio; B: butyrate, % total volatile fatty acids; CH<sub>4</sub>: methane production; Gas: total gas production; FOM: fermented organic matter.
